# Supplementary material
Source: ML conference proceedings conference paper supplement (https://proceedings.mlr.press/v139/xu21j.html)
Supplement: Supplementary file [file xu21j-supp.pdf]

## Supplementary Materials

### A. Derivation of Doubly Robust Policy Gradient Estimator

In this section, we introduce how to derive the doubly robust policy gradient  $G_{\text{DR}}(w)$  in eq. (4)

Consider the setting of off-policy sampling specified in Section 2. Note that  $J(w)$  has the following alternative form:

$$J(w) = (1 - \gamma)\mathbb{E}_{\mu_0}[V_{\pi_w}(s_0)] + \mathbb{E}_d[\rho_{\pi_w}(s, a)(r(s, a, s') - Q_{\pi_w}(s, a) + \gamma\mathbb{E}[V_{\pi_w}(s')|s, a])], \quad (16)$$

where  $\rho_{\pi_w}(s, a) = \nu_{\pi_w}(s, a)/d(s, a)$  denotes the *distribution correction ratio*. With a sample  $(s, a, r, s', a') \sim \mathcal{D}_d \cdot \pi_w(\cdot)$  and a sample  $(s_0, a_0) \sim \mu_0 \cdot \pi_w(\cdot)$ , we can formulate the following stochastic estimator of  $J(w)$ :

$$\hat{J}(w) = \underbrace{(1 - \gamma)V_{\pi_w}(s_0)}_{\text{unbiased estimator}} + \underbrace{\rho_{\pi_w}(s, a)(r(s, a, s') - Q_{\pi_w}(s, a) + \gamma V_{\pi_w}(s'))}_{\text{baseline}}. \quad (17)$$

Note that the first term in eq. (17) is an unbiased estimator of  $J(w)$  and the second term in eq. (17) is the baseline that can help to reduce the variance (Jiang & Li, 2016; Huang & Jiang, 2020). Note that if we replace the value functions  $V_{\pi_w}$ ,  $Q_{\pi_w}$  and the density ratio  $\rho_{\pi_w}$  with their estimators  $\hat{V}_{\pi_w}$ ,  $\hat{Q}_{\pi_w}$ , and  $\hat{\rho}_{\pi_w}$ , respectively, we can obtain a doubly robust bias reduced value function estimator (Tang et al., 2019). Next, we take the derivative of  $\hat{J}(w)$  to obtain an unbiased estimator of  $\nabla J(w)$  which takes the following form:

$$\begin{aligned} \nabla_w \hat{J}(w) &= (1 - \gamma)d_{\pi_w}^v(s_0) + d_{\pi_w}^{\rho}(s, a)(r(s, a, s') - Q_{\pi_w}(s, a) + \gamma V_{\pi_w}(s')) \\ &\quad + \rho_{\pi_w}(s, a)(-d_{\pi_w}^q(s, a) + \gamma d_{\pi_w}^v(s')) \\ &= (1 - \gamma)\mathbb{E}_{\pi_w}[Q_{\pi_w}(s_0, a_0)\nabla_w \log \pi_w(s_0, a_0) + d_{\pi_w}^q(s_0, a_0)] \\ &\quad + d_{\pi_w}^{\rho}(s, a)(r(s, a, s') - Q_{\pi_w}(s, a) + \gamma\mathbb{E}_{\pi_w}[Q_{\pi_w}(s', a')]) \\ &\quad + \rho_{\pi_w}(s, a)(-d_{\pi_w}^q(s, a) + \gamma\mathbb{E}_{\pi_w}[Q_{\pi_w}(s'_i, a'_i)\nabla_w \log \pi_w(s'_i, a'_i) + d_{\pi_w}^q(s'_i, a'_i)]), \end{aligned} \quad (18)$$

where  $d_{\pi_w}^v$ ,  $d_{\pi_w}^q$ ,  $d_{\pi_w}^{\rho}$  denote  $\nabla_w V_{\pi_w}$ ,  $\nabla_w Q_{\pi_w}$ ,  $\nabla_w \rho_{\pi_w}$ , respectively. Given samples  $s_0 \sim \mu_0(\cdot)$ ,  $a_0 \sim \pi_w(\cdot|s_0)$  and  $(s, a, r, s') \sim \mathcal{D}_d$ ,  $a' \sim \pi_w(\cdot|s')$ , and replace  $Q_{\pi_w}$ ,  $\rho_{\pi_w}$ ,  $d_{\pi_w}^{\rho}$  and  $d_{\pi_w}^q$  with estimators  $\hat{Q}_{\pi_w}$ ,  $\hat{\rho}_{\pi_w}$ ,  $\hat{d}_{\pi_w}^{\rho}$  and  $\hat{d}_{\pi_w}^q$ , respectively, we can obtain the following doubly robust estimator  $G_{\text{DR}}(w)$ :

$$\begin{aligned} G_{\text{DR}}(w) &= (1 - \gamma)\left(\hat{Q}_{\pi_w}(s_0, a_0)\nabla_w \log \pi_w(a_0|s_0) + \hat{d}_{\pi_w}^q(s_0, a_0)\right) + \hat{d}_{\pi_w}^{\rho}(s, a)\left(r(s, a, s') - \hat{Q}_{\pi_w}(s, a) + \gamma\hat{Q}_{\pi_w}(s', a')\right) \\ &\quad + \hat{\rho}_{\pi_w}(s, a)\left[-\hat{d}_{\pi_w}^q(s, a) + \gamma\left(\hat{Q}_{\pi_w}(s', a')\nabla_w \log \pi_w(a'|s') + \hat{d}_{\pi_w}^q(s', a')\right)\right]. \end{aligned} \quad (19)$$

**Connection with other off-policy gradient estimators:** Our doubly robust estimator  $G_{\text{DR}}$  can recover a number of existing off-policy policy gradient estimators as special cases by deactivating certain estimators, i.e., letting those estimators be zero.

(1) Deactivating  $\hat{d}_{\pi_w}^q$  and  $\hat{d}_{\pi_w}^{\rho}$ : In this case,  $G_{\text{DR}}(w)$  takes the following form

$$\begin{aligned} G_{\text{DR}}^I(w) &= (1 - \gamma)\hat{Q}_{\pi_w}(s_0, a_0)\nabla_w \log \pi_w(a_0|s_0) + \gamma\hat{\rho}_{\pi_w}(s, a)\left(\hat{Q}_{\pi_w}(s', a')\nabla_w \log \pi_w(a'|s') + \hat{d}_{\pi_w}^q(s', a')\right) \\ &= \hat{\rho}_{\pi_w}(s, a)\mathbb{E}_{s' \sim \hat{P}(\cdot|s, a), \tilde{a}' \sim \pi_w(\cdot|\tilde{s}')} \left[\hat{Q}_{\pi_w}(\tilde{s}', \tilde{a}')\nabla_w \log \pi_w(\tilde{a}'|\tilde{s}')\right], \end{aligned} \quad (20)$$

where  $(\tilde{s}', \tilde{a}')$  is generated using the method in the discussion of Critic III in Section 3.2. Note that the policy gradient  $\nabla_w J(w)$  has the following equivalent form

$$\nabla_w J(w) = \mathbb{E}_{(s, a) \sim \mathcal{D}} \left[ \rho_{\pi_w}(s, a)\mathbb{E}_{s' \sim \hat{P}(\cdot|s, a), \tilde{a}' \sim \pi_w(\cdot|\tilde{s}')} [Q_{\pi_w}(\tilde{s}', \tilde{a}')\nabla_w \log \pi_w(\tilde{a}'|\tilde{s}')|(s, a)] \right].$$

Thus,  $G_{\text{DR}}^I(w)$  can be viewed as an off-policy policy gradient estimator with only approximations of  $\rho_{\pi_w}$  and  $Q_{\pi_w}$ . Such an estimator has been adopted in the previous studies of provably convergent off-policy actor-critic (Zhang et al., 2019c; Liu et al., 2019), which is referred as AC-DC in our experiment in Section 5. Such an estimator has also been adopted by many off-policy actor-critic algorithms such as ACE (Imani et al., 2018), Geoff-PAC (Zhang et al., 2019b), OPPOSD (Liu et al., 2019) and COF-PAC (Zhang et al., 2019c).

(2) Deactivating  $\rho_{\pi_w}$  and  $\hat{d}_{\pi_w}^\rho$ : In this case,  $G_{\text{DR}}(w)$  has the following form

$$G_{\text{DR}}^{II}(w) = (1 - \gamma) \left( \hat{Q}_{\pi_w}(s_0, a_0) \nabla_w \log \pi_w(a_0 | s_0) + \hat{d}_{\pi_w}^q(s_0, a_0) \right). \quad (21)$$

Such an estimator  $G_{\text{DR}}^{II}(w)$  can be viewed as the one adopted by off-policy DPG/DDPG (Silver et al., 2014; Lillicrap et al., 2016) when the policy  $\pi_w$  converges to a deterministic policy.

(3) Deactivating  $\hat{Q}_{\pi_w}$  and  $\hat{d}_{\pi_w}^q$ : In this case,  $G_{\text{DR}}(w)$  has the following form

$$G_{\text{DR}}^{III}(w) = \hat{d}_{\pi_w}^\rho(s, a) r(s, a, s'). \quad (22)$$

This off-policy policy gradient estimator has been adopted in (Morimura et al., 2010) for averaged MDP setting.

## B. Proof of Theorem 1

Without specification, the expectation is taken with respect to the randomness of samples  $(s, a, r(s, a, s'), s')$  and  $s_0$ , in which  $(s, a) \sim d(\cdot)$ ,  $s' \sim P(\cdot | s, a)$  and  $s_0 \sim \mu_0(\cdot)$ . If  $a'$  or  $a_0$  appears, then the expectation is taken with respect to the policy i.e.,  $a' \sim \pi_w(\cdot | s')$  and  $a_0 \sim \pi_w(\cdot | s_0)$ . We compute the bias of  $G_{\text{DR}}(w)$  as follows.

$$\begin{aligned} & \mathbb{E}[G_{\text{DR}}(w)] - \nabla_w J(w) \\ &= (1 - \gamma) \mathbb{E}[\hat{d}_{\pi_w}^v(s_0)] + \mathbb{E}[\hat{d}_{\pi_w}^\rho(s, a)(r(s, a, s') - \hat{Q}_{\pi_w}(s, a) + \gamma \hat{V}_{\pi_w}(s'))] + \mathbb{E}[\hat{\rho}_{\pi_w}(s, a)(-\hat{d}_{\pi_w}^q(s, a) + \gamma \hat{d}_{\pi_w}^v(s'))] \\ & \quad - (1 - \gamma) \mathbb{E}[d_{\pi_w}^v(s_0)] - \mathbb{E}[d_{\pi_w}^\rho(s, a)(r(s, a, s') - Q_{\pi_w}(s, a) + \gamma V_{\pi_w}(s'))] - \mathbb{E}[\rho_{\pi_w}(s, a)(-d_{\pi_w}^q(s, a) + \gamma d_{\pi_w}^v(s'))] \\ &= \mathbb{E}[(\hat{\rho}_{\pi_w}(s, a) - \rho_{\pi_w}(s, a))(-\hat{d}_{\pi_w}^q(s, a) + d_{\pi_w}^q(s, a))] + \mathbb{E}[(-\hat{d}_{\pi_w}^\rho(s, a) + d_{\pi_w}^\rho(s, a))(-\hat{Q}_{\pi_w}(s, a) + Q_{\pi_w}(s, a))] \\ & \quad + \gamma \mathbb{E}[(\hat{\rho}_{\pi_w}(s, a) - \rho_{\pi_w}(s, a))(\hat{d}_{\pi_w}^v(s) - d_{\pi_w}^v(s))] + \gamma \mathbb{E}[(\hat{d}_{\pi_w}^\rho(s, a) - d_{\pi_w}^\rho(s, a))(\hat{V}_{\pi_w}(s') - V_{\pi_w}(s'))] \\ & \quad + \mathbb{E}[d_{\pi_w}^\rho(s, a)(-\hat{Q}_{\pi_w}(s, a) + Q_{\pi_w}(s, a))] + \mathbb{E}[\rho_{\pi_w}(s, a)(-\hat{d}_{\pi_w}^q(s, a) + d_{\pi_w}^q(s, a))] \\ & \quad + \gamma \mathbb{E}[d_{\pi_w}^\rho(s, a)(\hat{V}_{\pi_w}(s') - V_{\pi_w}(s'))] + \gamma \mathbb{E}[\rho_{\pi_w}(s, a)(\hat{d}_{\pi_w}^v(s') - d_{\pi_w}^v(s'))] + (1 - \gamma) \mathbb{E}[\hat{d}_{\pi_w}^v(s_0) - d_{\pi_w}^v(s_0)] \\ & \quad + \mathbb{E}[(\hat{\rho}_{\pi_w}(s, a) - \rho_{\pi_w}(s, a))(-d_{\pi_w}^q(s, a) + \gamma d_{\pi_w}^v(s'))] \\ & \quad + \mathbb{E}[(\hat{d}_{\pi_w}^\rho(s, a) - d_{\pi_w}^\rho(s, a))(r(s, a, s') - Q_{\pi_w}(s, a) + \gamma V_{\pi_w}(s'))] \\ &= -\mathbb{E}[\varepsilon_\rho(s, a) \varepsilon_{d^q}(s, a)] - \mathbb{E}[\varepsilon_{d^\rho}(s, a) \varepsilon_q(s, a)] + \gamma \mathbb{E}[\varepsilon_\rho(s, a) \varepsilon_{d^v}(s')] + \gamma \mathbb{E}[\varepsilon_\rho(s, a) \varepsilon_v(s')] \\ & \quad + S_1 + S_2 + S_3, \end{aligned} \quad (23)$$

where

$$\begin{aligned} S_1 &= \mathbb{E}[d_{\pi_w}^\rho(s, a)(-\hat{Q}_{\pi_w}(s, a) + Q_{\pi_w}(s, a))] + \mathbb{E}[\rho_{\pi_w}(s, a)(-\hat{d}_{\pi_w}^q(s, a) + d_{\pi_w}^q(s, a))] \\ & \quad + \gamma \mathbb{E}[d_{\pi_w}^\rho(s, a)(\hat{V}_{\pi_w}(s') - V_{\pi_w}(s'))] + \gamma \mathbb{E}[\rho_{\pi_w}(s, a)(\hat{d}_{\pi_w}^v(s') - d_{\pi_w}^v(s'))] + (1 - \gamma) \mathbb{E}[\hat{d}_{\pi_w}^v(s_0) - d_{\pi_w}^v(s_0)], \\ S_2 &= \mathbb{E}[(\hat{\rho}_{\pi_w}(s, a) - \rho_{\pi_w}(s, a))(-d_{\pi_w}^q(s, a) + \gamma d_{\pi_w}^v(s'))], \\ S_3 &= \mathbb{E}[(\hat{d}_{\pi_w}^\rho(s, a) - d_{\pi_w}^\rho(s, a))(r(s, a, s') - Q_{\pi_w}(s, a) + \gamma V_{\pi_w}(s'))]. \end{aligned}$$

We then proceed to show that  $S_1 = S_2 = S_3 = 0$ . First consider  $S_1$ . Following from the definitions of  $\hat{d}_{\pi_w}^v$  and  $d_{\pi_w}^v$ , we have

$$\begin{aligned} S_1 &= \mathbb{E}[d_{\pi_w}^\rho(s, a)(-\hat{Q}_{\pi_w}(s, a) + Q_{\pi_w}(s, a))] + \mathbb{E}[\rho_{\pi_w}(s, a)(-\hat{d}_{\pi_w}^q(s, a) + d_{\pi_w}^q(s, a))] + \gamma \mathbb{E}[d_{\pi_w}^\rho(s, a)(\hat{V}_{\pi_w}(s') - V_{\pi_w}(s'))] \\ & \quad + \gamma \mathbb{E}[\rho_{\pi_w}(s, a)(\mathbb{E}[\hat{Q}_{\pi_w}(s', a') \nabla_w \log \pi_w(s', a') + \hat{d}_{\pi_w}^q(s') | s'] - \mathbb{E}[Q_{\pi_w}(s', a') \nabla_w \log \pi_w(s', a') + d_{\pi_w}^q(s') | s'])] \\ & \quad + (1 - \gamma) \mathbb{E}[\mathbb{E}[\hat{Q}_{\pi_w}(s_0, a_0) \nabla_w \log \pi_w(s_0, a_0) + \hat{d}_{\pi_w}^q(s_0) | s_0] - \mathbb{E}[Q_{\pi_w}(s_0, a_0) \nabla_w \log \pi_w(s_0, a_0) + d_{\pi_w}^q(s_0) | s_0]] \\ &= \mathbb{E}[\rho_{\pi_w}(s, a)(d_{\pi_w}^q(s, a) - \hat{d}_{\pi_w}^q(s, a))] - \gamma \mathbb{E}[\mathbb{E}[d_{\pi_w}^q(s', a') - \hat{d}_{\pi_w}^q(s', a') | (s, a) \sim \nu_{\pi_w}(s, a)]] \\ & \quad - (1 - \gamma) \mathbb{E}[d_{\pi_w}^q(s_0, a_0) - \hat{d}_{\pi_w}^q(s_0, a_0)] \\ & \quad + \mathbb{E}[d_{\pi_w}^\rho(s, a)(Q_{\pi_w}(s, a) - \hat{Q}_{\pi_w}(s, a))] - \gamma \mathbb{E}[d_{\pi_w}^\rho(s, a)(V_{\pi_w}(s') - \hat{V}_{\pi_w}(s'))] \\ & \quad - \gamma \mathbb{E}[\rho_{\pi_w}(s, a) \mathbb{E}[(Q_{\pi_w}(s', a') - \hat{Q}_{\pi_w}(s', a')) \nabla_w \log \pi_w(s', a') | s, a]] \end{aligned}$$

$$-(1-\gamma)\mathbb{E}[(Q_{\pi_w}(s_0, a_0) - \hat{Q}_{\pi_w}(s_0, a_0))\nabla_w \log \pi_w(s_0, a_0)]. \quad (24)$$

For the first three terms in eq. (24), we have

$$\begin{aligned} & \mathbb{E}[\rho_{\pi_w}(s, a)(d_{\pi_w}^q(s, a) - \hat{d}_{\pi_w}^q(s, a))] - \gamma\mathbb{E}[\mathbb{E}[d_{\pi_w}^q(s', a') - \hat{d}_{\pi_w}^q(s', a')|(s, a) \sim \nu_{\pi_w}(s, a)]] \\ & \quad - (1-\gamma)\mathbb{E}[d_{\pi_w}^q(s_0, a_0) - \hat{d}_{\pi_w}^q(s_0, a_0)] \\ & = \mathbb{E}_{(s,a) \sim \nu_{\pi_w}}[d_{\pi_w}^q(s, a) - \hat{d}_{\pi_w}^q(s, a)] - \gamma\mathbb{E}_{(s,a) \sim \nu_{\pi_w}}[\mathbb{E}[d_{\pi_w}^q(s', a') - \hat{d}_{\pi_w}^q(s', a')|s, a]] \\ & \quad - (1-\gamma)\mathbb{E}[d_{\pi_w}^q(s_0, a_0) - \hat{d}_{\pi_w}^q(s_0, a_0)] \\ & \stackrel{(i)}{=} \mathbb{E}_{(s,a) \sim \nu_{\pi_w}}[d_{\pi_w}^q(s, a) - \hat{d}_{\pi_w}^q(s, a)] - \mathbb{E}_{(s,a) \sim \nu_{\pi_w}}[\mathbb{E}[d_{\pi_w}^q(s', a') - \hat{d}_{\pi_w}^q(s', a')|s' \sim \tilde{P}(\cdot|s, a), a' \sim \pi_w(\cdot|s')]] \\ & \stackrel{(ii)}{=} \mathbb{E}_{(s,a) \sim \nu_{\pi_w}}[d_{\pi_w}^q(s, a) - \hat{d}_{\pi_w}^q(s, a)] - \mathbb{E}_{(s',a') \sim \nu_{\pi_w}}[d_{\pi_w}^q(s', a') - \hat{d}_{\pi_w}^q(s', a')] \\ & = 0, \end{aligned}$$

where (i) follows from the definition  $\tilde{P}(\cdot|s, a) = \gamma P(\cdot|s, a) + (1-\gamma)\mu_0(\cdot)$ , and (ii) follows from the fact that  $\nu_{\pi_w}$  is the stationary distribution of MDP with the transition kernel  $\tilde{P}(\cdot|s, a)$  and policy  $\pi_w$ , i.e.,  $\pi_w(a'|s') \sum_{(s,a)} \nu_{\pi_w}(s, a) \tilde{P}(s'|s, a) = \nu_{\pi_w}(s', a')$ . For the last four terms in eq. (24), note that for any function  $f(s, a)$ , we have the following holds

$$\begin{aligned} & \mathbb{E}[d_{\pi_w}^p(s, a)f(s, a)] - \gamma\mathbb{E}[d_{\pi_w}^p(s, a)\mathbb{E}[f(s', a')|s']] - \gamma\mathbb{E}[\rho_{\pi_w}(s, a)\mathbb{E}[f(s', a')\nabla_w \log \pi_w(s', a')|s, a]] \\ & \quad - (1-\gamma)\mathbb{E}[f(s_0, a_0)\nabla_w \log \pi_w(s_0, a_0)] \\ & = \nabla_w \mathbb{E}[\rho_{\pi_w}(s, a)f(s, a)] - \gamma\nabla_w \mathbb{E}[\rho_{\pi_w}(s, a)\mathbb{E}[f(s', a')|s']] - (1-\gamma)\nabla_w \mathbb{E}[\mathbb{E}[f(s_0, a_0)|s_0]] \\ & = \nabla_w (\mathbb{E}[\rho_{\pi_w}(s, a)f(s, a)] - \gamma\mathbb{E}[\rho_{\pi_w}(s, a)\mathbb{E}[f(s', a')|s']] - (1-\gamma)\nabla_w \mathbb{E}[\mathbb{E}[f(s_0, a_0)|s_0]]) \\ & \stackrel{(i)}{=} \nabla_w (\mathbb{E}_{(s,a) \sim \nu_{\pi_w}}[f(s, a)] - \mathbb{E}_{(s',a') \sim \nu_{\pi_w}}[f(s', a')]) \\ & = 0, \end{aligned}$$

where (i) follows from the reasons similar to how we proceed eq. (24). Letting  $f(s, a) = Q_{\pi_w}(s, a) - \hat{Q}_{\pi_w}(s, a)$ , we can then conclude that the summation of the last four terms in eq. (24) is 0, which implies  $S_1 = 0$ .

We then consider the term  $S_2$ . Note that for any function  $f(s, a)$ , we have

$$\begin{aligned} & \mathbb{E}[f(s, a)(-d_{\pi_w}^q(s, a) + \gamma d_{\pi_w}^v(s'))] \\ & = \nabla_w \mathbb{E}[f(s, a)(r(s, a, s') + \gamma V_{\pi_w}(s') - Q_{\pi_w}(s, a))] \\ & = \nabla_w \mathbb{E}[f(s, a)(\mathbb{E}[r(s, a, s')|s] + \gamma \mathbb{E}[V_{\pi_w}(s')|s, a] - Q_{\pi_w}(s, a))] \\ & = 0. \end{aligned} \quad (25)$$

Letting  $f(s, a) = \hat{\rho}_{\pi_w}(s, a) - \rho_{\pi_w}(s, a)$ , we can then conclude that  $S_2 = 0$ . To consider  $S_3$ , we proceed as follows:

$$\begin{aligned} S_3 & = \mathbb{E}[(\hat{d}_{\pi_w}^p(s, a) - d_{\pi_w}^p(s, a))(r(s, a, s') - Q_{\pi_w}(s, a) + \gamma V_{\pi_w}(s'))] \\ & = \mathbb{E}[(\hat{d}_{\pi_w}^p(s, a) - d_{\pi_w}^p(s, a))(\mathbb{E}[r(s, a, s')|s, a] - Q_{\pi_w}(s, a) + \gamma \mathbb{E}[V_{\pi_w}(s')|s, a])] \\ & = 0. \end{aligned}$$

Since we have shown that  $S_1 = S_2 = S_3 = 0$ , eq. (23) becomes

$$\begin{aligned} & \mathbb{E}[G_{\text{DR}}(w)] - \nabla_w J(w) \\ & = -\mathbb{E}[\varepsilon_\rho(s, a)\varepsilon_d^q(s, a)] - \mathbb{E}[\varepsilon_{d^p}(s, a)\varepsilon_q(s, a)] + \gamma\mathbb{E}[\varepsilon_\rho(s, a)\varepsilon_{d^v}(s')] + \gamma\mathbb{E}[\varepsilon_\rho(s, a)\varepsilon_v(s')], \end{aligned}$$

which completes the proof.

## C. Supporting Lemmas for Theorem 2

In order to develop the property for Critic  $\Gamma$ 's update in eq. (6), we first introduce the following definitions.

Given a sample from mini-batch  $(s_i, a_i, r_i, s'_i)$ ,  $a'_i \sim \pi_{w_t}(\cdot|s'_i)$  and a sample  $s_{0,i} \sim \mu_0$ , we define the following matrix  $M_{i,t} \in \mathbb{R}^{(2d_1+1) \times (2d_1+1)}$  and vector  $m_{i,t} \in \mathbb{R}^{2d_1+1 \times 1}$

$$M_{i,t} = \begin{bmatrix} -\phi_i^\top \phi_i & -(\phi_i - \gamma \phi'_i) \phi_i^\top & 0 \\ \phi_i (\phi_i^\top - \gamma \phi_i'^\top) & 0 & -\phi_i \\ 0 & \phi_i^\top & -1 \end{bmatrix}, \quad m_{i,t} = \begin{bmatrix} (1-\gamma)\phi_{0,i} \\ -r_i \phi_i \\ -1 \end{bmatrix}. \quad (26)$$

Moreover, consider the matrix  $M_{i,t}$ . We have the following holds

$$\begin{aligned} \|M_{i,t}\|_F^2 &= \|\phi_i^\top \phi_i\|_F^2 + 2\|(\phi_i - \gamma \phi'_i) \phi_i^\top\|_F^2 + 2\|\phi_i\|_2^2 + 1 \\ &\leq C_\phi^4 + 2(1+\gamma)^2 C_\phi^4 + 2C_\phi^2 + 1, \end{aligned} \quad (27)$$

which implies  $\|M_{i,t}\|_F \leq C_M$ , where  $C_M = \sqrt{9C_\phi^4 + 2C_\phi^2 + 1}$ . For the vector  $m_{i,t}$ , we have

$$\|m_{i,t}\|_2^2 \leq (1-\gamma)^2 \|\phi_i\|_2^2 + r_{\max}^2 \|\phi_i\|_2^2 + 1 \leq [(1-\gamma)^2 + r_{\max}^2] C_\phi^2 + 1, \quad (28)$$

which implies  $\|m_{i,t}\|_2 \leq C_m$ , where  $C_m = \sqrt{(1+r_{\max}^2)C_\phi^2 + 1}$ .

We define the semi-stochastic-gradient as  $g_{i,t}(\kappa) = M_{i,t}\kappa + m_{i,t}$ . Then the iteration in eq. (6) can be rewritten as

$$\kappa_{t+1} = \kappa_t + \beta_1 \hat{g}_t(\kappa_t), \quad (29)$$

where  $\hat{g}_t(\kappa_t) = \frac{1}{N} \sum_i g_{i,t}(\kappa_t)$ . We also define  $M_t = \mathbb{E}_i[M_{i,t}]$  and  $m_t = \mathbb{E}_i[m_{i,t}]$ , i.e.,

$$M_t = \begin{bmatrix} -\mathbb{E}_{\mathcal{D}_d \cdot \pi_{w_t}}[\phi^\top \phi] & -\mathbb{E}_{\mathcal{D}_d \cdot \pi_{w_t}}[(\phi - \gamma \phi') \phi^\top] & 0 \\ \mathbb{E}_{\mathcal{D}_d \cdot \pi_{w_t}}[\phi(\phi^\top - \gamma \phi'^\top)] & 0 & -\mathbb{E}_{\mathcal{D}_d \cdot \pi_{w_t}}[\phi] \\ 0 & \mathbb{E}_{\mathcal{D}_d \cdot \pi_{w_t}}[\phi^\top] & -1 \end{bmatrix}, \quad m_t = \begin{bmatrix} (1-\gamma)\mathbb{E}_{\mu_0 \cdot \pi_{w_t}}[\phi] \\ -\mathbb{E}_{\mathcal{D}}[r\phi] \\ -1 \end{bmatrix},$$

and semi-gradient  $g_t(\kappa) = M_t \kappa + m_t$ . We further define the fixed point of the iteration eq. (29) as

$$\kappa_t^* = M_t^{-1} m_t = [\theta_{q,t}^{*\top}, \theta_{\rho,t}^{*\top}, \eta_t^*]^\top. \quad (30)$$

**Lemma 1.** Consider one step update in eq. (6). Define  $\kappa_t = [\theta_{q,t}^\top, \theta_{\rho,t}^\top, \eta_t]^\top$  and  $\kappa_t^*$  in eq. (30). Let  $\beta_1 \leq \min\{1/\lambda_M, \lambda_m/52C_M^2\}$ , we have

$$\mathbb{E} \left[ \|\kappa_{t+1} - \kappa_t^*\|_2^2 | \mathcal{F}_t \right] \leq \left( 1 - \frac{1}{2} \beta_1 \lambda_M \right) \|\kappa_t - \kappa_t^*\|_2^2 + \frac{C_1}{N},$$

where  $C_1 = 24\beta_1^2(C_M^2 R_\kappa^2 + C_m^2)$ .

*Proof.* It has been shown in (Zhang et al., 2020b) that  $M_t$  is a Hurwitz matrix which satisfies  $(\kappa_t - \kappa_t^*)^\top M_t (\kappa_t - \kappa_t^*) \leq -\lambda_M \|\kappa_t - \kappa_t^*\|_2^2$ , where  $\lambda_M > 0$  is a constant. We then proceed as follows:

$$\begin{aligned} \|\kappa_{t+1} - \kappa_t^*\|_2^2 &= \|\kappa_t + \beta_1 \hat{g}_t(\kappa_t) - \kappa_t^*\|_2^2 \\ &= \|\kappa_t - \kappa_t^*\|_2^2 + \beta_1 \hat{g}_t(\kappa_t)^\top (\kappa_t - \kappa_t^*) + \beta_1^2 \|\hat{g}_t(\kappa_t)\|_2^2 \\ &= \|\kappa_t - \kappa_t^*\|_2^2 + \beta_1 g_t(\kappa_t)^\top (\kappa_t - \kappa_t^*) + \beta_1 (\hat{g}_t(\kappa_t) - g_t(\kappa_t))^\top (\kappa_t - \kappa_t^*) + \beta_1^2 \|\hat{g}_t(\kappa_t) - g_t(\kappa_t) + g_t(\kappa_t)\|_2^2 \\ &\stackrel{(i)}{\leq} (1 - \beta_1 \lambda_M) \|\kappa_t - \kappa_t^*\|_2^2 + \beta_1 (\hat{g}_t(\kappa_t) - g_t(\kappa_t))^\top (\kappa_t - \kappa_t^*) + 2\beta_1^2 \|\hat{g}_t(\kappa_t) - g_t(\kappa_t)\|_2^2 + 2\beta_1^2 \|g_t(\kappa_t)\|_2^2 \\ &\stackrel{(ii)}{\leq} (1 - \beta_1 \lambda_M + 2\beta_1^2 C_M^2) \|\kappa_t - \kappa_t^*\|_2^2 + \beta_1 (\hat{g}_t(\kappa_t) - g_t(\kappa_t))^\top (\kappa_t - \kappa_t^*) + 2\beta_1^2 \|\hat{g}_t(\kappa_t) - g_t(\kappa_t)\|_2^2, \end{aligned} \quad (31)$$

where (i) follows because  $g_t(\kappa_t) = M_t(\kappa_t - \kappa_t^*)$  and (ii) follows because  $\|M\|_F \leq C_M$ . Taking the expectation on both sides of eq. (31) conditional on  $\mathcal{F}_t$  yields

$$\mathbb{E} \left[ \|\kappa_{t+1} - \kappa_t^*\|_2^2 | \mathcal{F}_t \right] \leq (1 - \beta_1 \lambda_M + \beta_1^2 C_M^2) \|\kappa_t - \kappa_t^*\|_2^2 + 2\beta_1^2 \mathbb{E} \left[ \|\hat{g}_t(\kappa_t) - g_t(\kappa_t)\|_2^2 | \mathcal{F}_t \right]. \quad (32)$$

Next we bound the term  $\mathbb{E} \left[ \|\hat{g}_t(\kappa_t) - g_t(\kappa_t)\|_2^2 | \mathcal{F}_t \right]$  as follows

$$\begin{aligned}
 & \mathbb{E} \left[ \|\hat{g}_t(\kappa_t) - g_t(\kappa_t)\|_2^2 | \mathcal{F}_t \right] \\
 &= \mathbb{E} \left[ \left\| (\hat{M}_t - M_t)\kappa_t + (\hat{m}_t - m_t) \right\|_2^2 | \mathcal{F}_t \right] \\
 &= \mathbb{E} \left[ \left\| (\hat{M}_t - M_t)(\kappa_t - \kappa_t^*) + (\hat{M}_t - M_t)\kappa_t^* + (\hat{m}_t - m_t) \right\|_2^2 | \mathcal{F}_t \right] \\
 &\leq 3\mathbb{E} \left[ \left\| \hat{M}_t - M_t \right\|_2^2 | \mathcal{F}_t \right] \|\kappa_t - \kappa_t^*\|_2^2 + 3R_\kappa^2 \mathbb{E} \left[ \left\| \hat{M}_t - M_t \right\|_2^2 | \mathcal{F}_t \right] + 3\mathbb{E} \left[ \|\hat{m}_t - m_t\|_2^2 | \mathcal{F}_t \right]. \tag{33}
 \end{aligned}$$

Recall that  $\|M_{i,t}\|_F \leq C_M$  and  $\|m_{i,t}\|_2 \leq C_m$ . We then have

$$\begin{aligned}
 \mathbb{E} \left[ \left\| \hat{M}_t - M_t \right\|_2^2 | \mathcal{F}_t \right] &\leq \mathbb{E} \left[ \left\| \hat{M}_t - M_t \right\|_F^2 | \mathcal{F}_t \right] = \mathbb{E} \left[ \left\| \frac{1}{N} \sum_i M_{i,t} - M_t \right\|_F^2 | \mathcal{F}_t \right] \\
 &\leq \frac{1}{N^2} \sum_i \sum_j \mathbb{E} [\langle M_{i,t} - M_t, M_{j,t} - M_t \rangle | \mathcal{F}_t] \\
 &= \frac{1}{N^2} \sum_i \mathbb{E} [\|M_{i,t} - M_t\|_2^2 | \mathcal{F}_t] \leq \frac{4C_M^2}{N}. \tag{34}
 \end{aligned}$$

Similarly, we can obtain

$$\mathbb{E} \left[ \|\hat{m}_t - m_t\|_2^2 | \mathcal{F}_t \right] \leq \frac{4C_m^2}{N}. \tag{35}$$

Substituting eq. (34) and eq. (35) into eq. (33) yields

$$\mathbb{E} \left[ \|\hat{g}_t(\kappa_t) - g_t(\kappa_t)\|_2^2 | \mathcal{F}_t \right] \leq \frac{12C_M^2}{N} \|\kappa_t - \kappa_t^*\|_2^2 + \frac{12(C_M^2 R_\kappa^2 + C_m^2)}{N}. \tag{36}$$

Substituting eq. (36) into eq. (32) yields

$$\mathbb{E} \left[ \|\kappa_{t+1} - \kappa_t^*\|_2^2 | \mathcal{F}_t \right] \leq (1 - \beta_1 \lambda_M + 26\beta_1^2 C_M^2) \|\kappa_t - \kappa_t^*\|_2^2 + \frac{24\beta_1^2 (C_M^2 R_\kappa^2 + C_m^2)}{N}. \tag{37}$$

Letting  $\beta_1 \leq \frac{\lambda_m}{52C_M^2}$ , we have

$$\mathbb{E} \left[ \|\kappa_{t+1} - \kappa_t^*\|_2^2 | \mathcal{F}_t \right] \leq \left( 1 - \frac{1}{2} \beta_1 \lambda_M \right) \|\kappa_t - \kappa_t^*\|_2^2 + \frac{24\beta_1^2 (C_M^2 R_\kappa^2 + C_m^2)}{N},$$

which completes the proof.  $\square$

We next develop the property for Critic II's update in eq. (9). We first introduce the following definitions.

Given a sample from mini-batch  $(s_i, a_i, r_i, s'_i)$ ,  $a'_i \sim \pi_{w_t}(\cdot | s'_i)$ , we define the following matrix  $U_{i,t} \in \mathbb{R}^{2d_3 \times 2d_3}$  and vector  $u_{i,t} \in \mathbb{R}^{2d_3 \times 1}$  as

$$U_{i,t} = \begin{bmatrix} 0 & (\gamma x'_i - x_i)x_i^\top \\ x_i(\gamma x'_i - x_i)^\top & -I \end{bmatrix}, \quad u_{i,t}(\theta_{q,t}) = \begin{bmatrix} 0 \\ \phi_i^\top \theta_{q,t} x_i \nabla_w \log \pi_{w_t}(a'_i | s'_i) \end{bmatrix}. \tag{38}$$

Moreover, consider the matrix  $U_t$  and the vector  $u_t$ . Following the steps similar to those in eq. (27) and eq. (28), we obtain  $\|U_{i,t}\|_F \leq C_U$  and  $\|u_{i,t}\|_2 \leq C_u$ , where  $C_U = \sqrt{8C_x^4 + d_3}$  and  $C_u = C_\phi R_q C_{sc}$ .

We also define the semi-stochastic-gradient as  $\ell_{i,t}(\zeta, \theta_q) = U_{i,t} \xi + u_{i,t}(\theta_q)$ . Then the iteration in eq. (14) can be rewritten as

$$\zeta_{t+1} = \zeta_t + \beta_3 \hat{\ell}_t(\zeta_t, \theta_{q,t}), \tag{39}$$

where  $\hat{\ell}_t(\zeta_t, \theta_{q,t}) = \frac{1}{N} \sum_i \ell_{i,t}(\zeta_t, \theta_{q,t})$ . We define  $U_t = \mathbb{E}_i[U_{i,t}]$  and  $u_t(\theta_{q,t}^*) = \mathbb{E}_i[u_{i,t}(\theta_{q,t}^*)]$ , i.e.,

$$U_t = \begin{bmatrix} 0 & \mathbb{E}_{\mathcal{D}_{d^*} \cdot \pi_{w_t}}[(\gamma x' - x)x^\top] \\ \mathbb{E}_{\mathcal{D}_{d^*} \cdot \pi_{w_t}}[x(\gamma x' - x)^\top] & -I \end{bmatrix}, \quad u_t(\theta_{q,t}^*) = \begin{bmatrix} 0 \\ \mathbb{E}_{\mathcal{D}_{d^*} \cdot \pi_{w_t}}[\phi'^\top \theta_{q,t}^* x \nabla_w \log \pi_{w_t}(a'|s')] \end{bmatrix}.$$

We define the semi-gradient as  $\ell_t(\zeta_t, \theta_{q,t}^*) = U_t \zeta_t + u_t(\theta_{q,t}^*)$ , and the fixed point of the iteration eq. (45) as

$$\zeta_t^* = U_t^{-1} u_t(\theta_{q,t}^*) = [\theta_{d_q,t}^{*\top}, \mathbf{0}^\top]^\top. \quad (40)$$

where  $\theta_{d_q,t}^{*\top} = A_{w_t}^{d_q-1} b_{w_t}^{d_q}$ , with  $A_w^{d_q} = \mathbb{E}_{\mathcal{D}_{d^*} \cdot \pi_w}[(\gamma x' - x)x^\top]$  and  $b_w^{d_q} = \mathbb{E}_{\mathcal{D}_{d^*} \cdot \pi_w}[\phi'^\top \theta_{q,w}^* x \nabla_w \log \pi_w(a'|s')]$ .

**Lemma 2.** Consider one step update in eq. (9). Define  $\zeta_t = [\theta_{d_q,t}^\top, w_{d_q,t}^\top]^\top$  and  $\zeta_t^*$  in eq. (40). Let  $\beta_3 \leq \min\{1/\lambda_U, \lambda_U/16C_U^2\}$  and  $N \geq \frac{192C_U^2}{\lambda_U} \left(\frac{2}{\lambda_U} + 2\beta_3\right)$ , we have

$$\mathbb{E} \left[ \|\zeta_{t+1} - \zeta_t^*\|_2^2 | \mathcal{F}_t \right] \leq \left(1 - \frac{1}{4}\beta_3\lambda_U\right) \|\zeta_t - \zeta_t^*\|_2^2 + C_3\beta_3 \|\theta_{q,t} - \theta_{q,t}^*\|_2^2 + \frac{C_4}{N},$$

where  $C_3 = \left(\frac{4}{\lambda_U} + 4\beta_3\right) C_\phi^2 C_x^2 C_\pi^2$  and  $C_4 = \left(\frac{48\beta_3}{\lambda_U} + 48\beta_3^2\right) (C_U^2 R_\zeta^2 + C_\phi^2 R_{\theta_q}^2 C_x^2 C_\pi^2)$ .

*Proof.* Following the steps similar to those in the proof of Theorem 1 in Chapter 5 of (Maei, 2011), we can show that  $U_t$  is a Hurwitz matrix which  $(\zeta_t - \zeta_t^*)^\top U_t (\zeta_t - \zeta_t^*) \leq -\lambda_U \|\zeta_t - \zeta_t^*\|_2^2$ , where  $\lambda_U > 0$  is a constant. Following steps similar to those in the proof of Theorem 4 in (Xu et al., 2020b), we can obtain

$$\begin{aligned} \mathbb{E} \left[ \|\zeta_{t+1} - \zeta_t^*\|_2^2 | \mathcal{F}_t \right] &= \left\| \zeta_t + \beta_3 \hat{\ell}_t(\zeta_t, \theta_{q,t}) - \zeta_t^* \right\|_2^2 \\ &\leq \left(1 - \frac{1}{2}\beta_3\lambda_U + 2C_U^2\beta_3^2\right) \|\zeta_t - \zeta_t^*\|_2^2 + \left(\frac{2\beta_3}{\lambda_U} + 2\beta_3^2\right) \mathbb{E} \left[ \left\| \hat{\ell}_t(\zeta_t, \theta_{q,t}) - \ell_t(\zeta_t, \theta_{q,t}^*) \right\|_2^2 | \mathcal{F}_t \right]. \end{aligned} \quad (41)$$

Next we bound the term  $\mathbb{E} \left[ \left\| \hat{\ell}_t(\zeta_t, \theta_{q,t}) - \ell_t(\zeta_t, \theta_{q,t}^*) \right\|_2^2 | \mathcal{F}_t \right]$  as follows:

$$\begin{aligned} &\mathbb{E} \left[ \left\| \hat{\ell}_t(\zeta_t, \theta_{q,t}) - \ell_t(\zeta_t, \theta_{q,t}^*) \right\|_2^2 | \mathcal{F}_t \right] \\ &= \mathbb{E} \left[ \left\| \hat{\ell}_t(\zeta_t, \theta_{q,t}) - \hat{\ell}_t(\zeta_t, \theta_{q,t}^*) + \hat{\ell}_t(\zeta_t, \theta_{q,t}^*) - \ell_t(\zeta_t, \theta_{q,t}^*) \right\|_2^2 | \mathcal{F}_t \right] \\ &= 2\mathbb{E} \left[ \left\| \hat{\ell}_t(\zeta_t, \theta_{q,t}) - \hat{\ell}_t(\zeta_t, \theta_{q,t}^*) \right\|_2^2 | \mathcal{F}_t \right] + 2\mathbb{E} \left[ \left\| \hat{\ell}_t(\zeta_t, \theta_{q,t}^*) - \ell_t(\zeta_t, \theta_{q,t}^*) \right\|_2^2 | \mathcal{F}_t \right] \\ &= 2\mathbb{E} \left[ \left\| \frac{1}{N} \sum_i (\ell_{i,t}(\zeta_t, \theta_{q,t}) - \ell_{i,t}(\zeta_t, \theta_{q,t}^*)) \right\|_2^2 | \mathcal{F}_t \right] + 2\mathbb{E} \left[ \left\| \hat{\ell}_t(\zeta_t, \theta_{q,t}^*) - \ell_t(\zeta_t, \theta_{q,t}^*) \right\|_2^2 | \mathcal{F}_t \right] \\ &\leq \frac{2}{N} \sum_i \mathbb{E} \left[ \left\| (\ell_{i,t}(\zeta_t, \theta_{q,t}) - \ell_{i,t}(\zeta_t, \theta_{q,t}^*)) \right\|_2^2 | \mathcal{F}_t \right] + 2\mathbb{E} \left[ \left\| \hat{\ell}_t(\zeta_t, \theta_{q,t}^*) - \ell_t(\zeta_t, \theta_{q,t}^*) \right\|_2^2 | \mathcal{F}_t \right] \\ &= \frac{2}{N} \sum_i \mathbb{E} \left[ \left\| \phi_i'^\top (\theta_{q,t} - \theta_{q,t}^*) x_i \nabla_w \log \pi_{w_t}(a'_i | s'_i) \right\|_2^2 | \mathcal{F}_t \right] + 2\mathbb{E} \left[ \left\| \hat{\ell}_t(\zeta_t, \theta_{q,t}^*) - \ell_t(\zeta_t, \theta_{q,t}^*) \right\|_2^2 | \mathcal{F}_t \right] \\ &= 2C_\phi^2 C_x^2 C_\pi^2 \|\theta_{q,t} - \theta_{q,t}^*\|_2^2 + 2\mathbb{E} \left[ \left\| \hat{\ell}_t(\zeta_t, \theta_{q,t}^*) - \ell_t(\zeta_t, \theta_{q,t}^*) \right\|_2^2 | \mathcal{F}_t \right]. \end{aligned} \quad (42)$$

To bound the term  $\mathbb{E} \left[ \left\| \hat{\ell}_t(\zeta_t, \theta_{q,t}^*) - \ell_t(\zeta_t, \theta_{q,t}^*) \right\|_2^2 | \mathcal{F}_t \right]$ , we follow the steps similar to those in the proof of bounding the term  $\mathbb{E} \left[ \left\| \hat{g}_t(\kappa_t) - g_t(\kappa_t) \right\|_2^2 | \mathcal{F}_t \right]$  in Lemma 1 to obtain

$$\mathbb{E} \left[ \left\| \hat{\ell}_t(\zeta_t, \theta_{q,t}^*) - \ell_t(\zeta_t, \theta_{q,t}^*) \right\|_2^2 | \mathcal{F}_t \right] \leq \frac{12C_U^2}{N} \|\zeta_t - \zeta_t^*\|_2^2 + \frac{12(C_U^2 R_\zeta^2 + C_\phi^2 R_{\theta_q}^2 C_x^2 C_\pi^2)}{N}, \quad (43)$$

Substituting eq. (43) and eq. (42) into eq. (41) yields

$$\begin{aligned}
 & \mathbb{E} \left[ \|\zeta_{t+1} - \zeta_t^*\|_2^2 | \mathcal{F}_t \right] \\
 & \leq \left( 1 - \frac{1}{2} \beta_3 \lambda_U + 2C_U^2 \beta_3^2 \right) \|\zeta_t - \zeta_t^*\|_2^2 \\
 & \quad + \left( \frac{2\beta_3}{\lambda_U} + 2\beta_3^2 \right) \left( 2C_\phi^2 C_x^2 C_\pi^2 \|\theta_{q,t} - \theta_{q,t}^*\|_2^2 + \frac{24C_U^2}{N} \|\zeta_t - \zeta_t^*\|_2^2 + \frac{24(C_U^2 R_\zeta^2 + C_\phi^2 R_{\theta_q}^2 C_x^2 C_\pi^2)}{N} \right) \\
 & = \left[ 1 - \frac{1}{2} \beta_3 \lambda_U + 2C_U^2 \beta_3^2 + \left( \frac{2\beta_3}{\lambda_U} + 2\beta_3^2 \right) \frac{24C_U^2}{N} \right] \|\zeta_t - \zeta_t^*\|_2^2 \\
 & \quad + \left( \frac{4\beta_3}{\lambda_U} + 4\beta_3^2 \right) C_\phi^2 C_x^2 C_\pi^2 \|\theta_{q,t} - \theta_{q,t}^*\|_2^2 + \left( \frac{2\beta_3}{\lambda_U} + 2\beta_3^2 \right) \frac{24(C_U^2 R_\zeta^2 + C_\phi^2 R_{\theta_q}^2 C_x^2 C_\pi^2)}{N}.
 \end{aligned}$$

Letting  $\beta_3 \leq \min\{1/\lambda_U, \lambda_U/16C_U^2\}$  and  $N \geq \frac{192C_U^2}{\lambda_U} \left( \frac{2}{\lambda_U} + 2\beta_3 \right)$ , we have

$$\mathbb{E} \left[ \|\zeta_{t+1} - \zeta_t^*\|_2^2 | \mathcal{F}_t \right] \leq \left( 1 - \frac{1}{4} \beta_3 \lambda_U \right) \|\zeta_t - \zeta_t^*\|_2^2 + C_3 \beta_3 \|\theta_{q,t} - \theta_{q,t}^*\|_2^2 + \frac{C_4}{N},$$

where  $C_3 = \left( \frac{4}{\lambda_U} + 4\beta_3 \right) C_\phi^2 C_x^2 C_\pi^2$  and  $C_4 = \left( \frac{48\beta_3}{\lambda_U} + 48\beta_3^2 \right) (C_U^2 R_\zeta^2 + C_\phi^2 R_{\theta_q}^2 C_x^2 C_\pi^2)$ .  $\square$

We next develop the property for Critic III's update. We first introduce the following definitions.

Given a sample  $(s_i, a_i, r_i, \tilde{s}'_i)$  generated as we discuss in Section 3 and  $a'_i \sim \pi_{w_t}(\cdot | s'_i)$ . We define the following matrix  $P_{i,t} \in \mathbb{R}^{2d_1 \times 2d_2}$  and vector  $p_{i,t} \in \mathbb{R}^{2d_2 \times 1}$  as

$$P_{i,t} = \begin{bmatrix} 0 & (\varphi_i - \tilde{\varphi}'_i) \tilde{\varphi}'_i{}^\top \\ \tilde{\varphi}'_i (\varphi_i - \tilde{\varphi}'_i)^\top & -I \end{bmatrix}, \quad p_{i,t} = \begin{bmatrix} 0 \\ \tilde{\varphi}'_i \nabla_w \log \pi_{w_t}(a'_i | \tilde{s}'_i) \end{bmatrix}. \quad (44)$$

Consider the matrix  $P_{i,t}$  and the vector  $p_{i,t}$ . Following the steps similar to those in eq. (27) and eq. (28), we obtain  $\|P_{i,t}\|_F \leq C_P$  and  $\|p_{i,t}\|_2 \leq C_p$ , where  $C_P = \sqrt{8C_\phi^4 + d_2}$  and  $C_p = C_\varphi C_{sc}$ .

We also define the semi-stochastic-gradient as  $h_{i,t}(\xi) = P_{i,t} \xi + p_{i,t}$ . Then the iteration in eq. (14) can be rewritten as

$$\xi_{t+1} = \xi_t + \beta_2 \hat{h}_t(\xi_t), \quad (45)$$

where  $\hat{h}_t(\xi_t) = \frac{1}{N} \sum_i h_{i,t}(\xi_t)$ . We define  $P_t = \mathbb{E}_i [P_{i,t}]$  and  $p_t = \mathbb{E}_i [p_{i,t}]$ , i.e.,

$$P_t = \begin{bmatrix} 0 & \mathbb{E}_{\tilde{\mathcal{D}}_d \cdot \pi_{w_t}} [(\varphi - \varphi') \varphi'^\top] \\ \mathbb{E}_{\tilde{\mathcal{D}}_d \cdot \pi_{w_t}} [\varphi' (\varphi - \varphi')^\top] & -I \end{bmatrix}, \quad p_t = \begin{bmatrix} 0 \\ \mathbb{E}_{\tilde{\mathcal{D}}_d \cdot \pi_{w_t}} [\varphi' \nabla_w \log \pi_{w_t}(a' | s')] \end{bmatrix}.$$

We further define the fixed point of the iteration eq. (45) as

$$\xi_t^* = P_t^{-1} p_t = [\theta_{\psi, w_t}^*{}^\top, 0^\top]^\top, \quad (46)$$

where  $\theta_{\psi, w_t}^*{}^\top = A_{w_t}^{\xi-1} b_{w_t}^\xi$ , with  $A_w^\xi = \mathbb{E}_{\tilde{\mathcal{D}}_d \cdot \pi_w} [(\varphi - \varphi') \varphi'^\top]$  and  $b_w^\xi = \mathbb{E}_{\tilde{\mathcal{D}}_d \cdot \pi_w} [\varphi' \nabla_w \log \pi_w(a' | \tilde{s}')]$ .

**Lemma 3.** Consider one step update in eq. (14). Define  $\xi_t = [\theta_{\psi, t}^\top, w_{\psi, t}^\top]^\top$  and  $\xi_t^*$  in eq. (46). Let  $\beta_2 \leq \min\{1/\lambda_P, \lambda_P/52C_P^2\}$ , we have

$$\mathbb{E} \left[ \|\xi_{t+1} - \xi_t^*\|_2^2 | \mathcal{F}_t \right] \leq \left( 1 - \frac{1}{2} \beta_2 \lambda_P \right) \|\xi_t - \xi_t^*\|_2^2 + \frac{C_2}{N},$$

where  $C_2 = 24\beta_2^2 (C_P^2 R_\xi^2 + C_p^2)$ .

*Proof.* Following the steps similar to those in the proof of Theorem 1 in Chapter 5 of (Maei, 2011), we can show that  $P_t$  is a Hurwitz matrix that satisfies  $(\xi_t - \xi_t^*)^\top P_t (\xi_t - \xi_t^*) \leq -\lambda_P \|\xi_t - \xi_t^*\|_2^2$ , where  $\lambda_P > 0$  is a constant. Then letting  $\beta_2 \leq \min\{\frac{\lambda_P}{52C_P^2}, 1/\lambda_P\}$ , following the steps similar to those in the proof of bounding the term  $\mathbb{E} \left[ \|\hat{g}_t(\kappa_t) - g_t(\kappa_t)\|_2^2 | \mathcal{F}_t \right]$  in Lemma 1, we can obtain

$$\mathbb{E} \left[ \|\xi_{t+1} - \xi_t^*\|_2^2 | \mathcal{F}_t \right] \leq \left( 1 - \frac{1}{2} \beta_2 \lambda_P \right) \|\xi_t - \xi_t^*\|_2^2 + \frac{24\beta_2^2 (C_P^2 R_\xi^2 + C_P^2)}{N}.$$

□

**Lemma 4.** Consider policy  $\pi_{w_1}$  and  $\pi_{w_2}$ , respectively, with the fixed points  $\kappa_1^* = [\theta_{q,w_1}^{*\top}, \theta_{\rho,w_1}^{*\top}, \eta_{w_1}^*]^\top$  and  $\kappa_2^* = [\theta_{q,w_1}^{*\top}, \theta_{\rho,w_1}^{*\top}, \eta_{w_1}^*]^\top$  as defined in eq. (46). We have

$$\begin{aligned} \|\theta_{q,w_1}^{*\top} - \theta_{q,w_2}^{*\top}\|_2 &\leq L_q \|w_1 - w_2\|_2, \\ \|\theta_{\rho,w_1}^{*\top} - \theta_{\rho,w_2}^{*\top}\|_2 &\leq L_\rho \|w_1 - w_2\|_2, \\ \|\eta_{w_1}^* - \eta_{w_2}^*\|_2 &\leq L_\eta \|w_1 - w_2\|_2, \end{aligned}$$

where  $L_q = \frac{L_C^k (C_E^k + C_A^k R_\rho) + \lambda_C^k (L_E^k + C_A^k L_\rho + L_A^k R_\rho)}{(\lambda_C^k)^2}$ ,  $L_\rho = \frac{C_G^k L_E^k + \lambda_F^k L_G^k}{(\lambda_F^k)^2}$ , and  $L_\eta = C_D^k L_\rho + L_D^k R_\rho$ , which further implies that

$$\|\kappa_1^* - \kappa_2^*\|_2 \leq L_\kappa \|w_1 - w_2\|_2,$$

where  $L_\kappa = \sqrt{L_q^2 + L_\rho^2 + L_\eta^2}$ .

*Proof.* Define  $A_w^k = \mathbb{E}_{\mathcal{D}_d \cdot \pi_w} [(\phi - \gamma\phi')\phi^\top]$ ,  $C_w^k = \mathbb{E}_{\mathcal{D}_d \cdot \pi_{w_t}} [\phi^\top \phi]$ ,  $D_w^k = \mathbb{E}_{\mathcal{D}_d \cdot \pi_{w_t}} [\phi]$  and  $E_w^k = (1 - \gamma)\mathbb{E}_{\mu_0 \cdot \pi_{w_t}} [\phi]$ . (Zhang et al., 2020b;a) showed that

$$\begin{aligned} \theta_{\rho,w}^* &= -F_w^k{}^{-1} G_w^k, \\ \theta_{q,w}^* &= C_w^k{}^{-1} (E_w^k - A_w^k \theta_{\rho,w}^*), \\ \eta_w^* &= D_w^k \theta_{\rho,w}^* - 1, \end{aligned}$$

where

$$\begin{aligned} F_w^k &= A_w^k{}^\top C_w^k{}^{-1} A_w^k + D_w^k D_w^k{}^\top, \\ G_w^k &= A_w^k{}^\top C_w^k{}^{-1} E_w^k + D_w^k. \end{aligned}$$

We first develop the Lipschitz property for the matrices  $A_w^k$ ,  $C_w^k$ ,  $D_w^k$ , and  $E_w^k$ . For  $A_w^k$ , we obtain the following

$$\begin{aligned} &\|A_{w_1}^k - A_{w_2}^k\|_2 \\ &= \left\| -\mathbb{E}_{\mathcal{D}_d \cdot \pi_{w_1}} [(\gamma\phi' - \phi)\phi^\top] + \mathbb{E}_{\mathcal{D}_d \cdot \pi_{w_2}} [(\gamma\phi' - \phi)\phi^\top] \right\|_2 \\ &= \left\| \int \gamma\phi(s', a')\phi(s, a)^\top (\pi_{w_2}(da'|s') - \pi_{w_1}(da'|s')) \tilde{P}(ds'|s, a) \mathcal{D}(ds, da) \right\|_2 \\ &\quad + \left\| \int \phi(s, a)\phi(s, a)^\top (\pi_{w_1}(da'|s') - \pi_{w_2}(da'|s')) \tilde{P}(ds'|s, a) \mathcal{D}(ds, da) \right\|_2 \\ &\leq \int \|\gamma\phi(s', a')\phi(s, a)^\top\|_2 |(\pi_{w_1}(da'|s') - \pi_{w_2}(da'|s'))| \tilde{P}(ds'|s, a) \mathcal{D}(ds, da) \\ &\quad + \int \|\phi(s, a)\phi(s, a)^\top\|_2 |(\pi_{w_2}(da'|s') - \pi_{w_1}(da'|s'))| \tilde{P}(ds'|s, a) \mathcal{D}(ds, da) \\ &\leq 2C_\phi^2 \int |\pi_{w_1}(da'|s') - \pi_{w_2}(da'|s')| \tilde{P}(ds'|s, a) \mathcal{D}(ds, da) \end{aligned}$$



$$\begin{aligned}
 &\leq 2C_\phi^2 \|\pi_{w_1}(\cdot) - \pi_{w_2}(\cdot)\|_{TV} \\
 &\leq 2C_\phi^2 L_\pi \|w_1 - w_2\|_2.
 \end{aligned} \tag{47}$$

For  $C_w^\kappa$ ,  $D_w^\kappa$ , and  $E_w^\kappa$ , following the steps similar to those in eq. (47), we obtain

$$\begin{aligned}
 \|C_{w_1}^\kappa - C_{w_2}^\kappa\|_2 &\leq C_\phi^2 L_\pi \|w_1 - w_2\|_2 = L_C^\kappa \|w_1 - w_2\|_2, \\
 \|D_{w_1}^\kappa - D_{w_2}^\kappa\|_2 &\leq C_\phi L_\pi \|w_1 - w_2\|_2 = L_D^\kappa \|w_1 - w_2\|_2, \\
 \|E_{w_1}^\kappa - E_{w_2}^\kappa\|_2 &\leq (1 - \gamma) C_\phi L_\pi \|w_1 - w_2\|_2 = L_E^\kappa \|w_1 - w_2\|_2,
 \end{aligned} \tag{48}$$

where  $L_C^\kappa = C_\phi^2 L_\pi$ ,  $L_D^\kappa = C_\phi L_\pi$ , and  $L_E^\kappa = (1 - \gamma) C_\phi L_\pi$ . We then proceed to bound the two terms  $\|F_{w_1}^\kappa - F_{w_2}^\kappa\|_2$  and  $\|G_{w_1}^\kappa - G_{w_2}^\kappa\|_2$ . For  $\|F_{w_1}^\kappa - F_{w_2}^\kappa\|_2$ , we obtain the following bound:

$$\begin{aligned}
 &\|F_{w_1}^\kappa - F_{w_2}^\kappa\|_2 \\
 &= \|A_{w_1}^{\kappa\top} C_{w_1}^{\kappa-1} A_{w_1}^\kappa - A_{w_2}^{\kappa\top} C_{w_2}^{\kappa-1} A_{w_2}^\kappa + D_{w_1}^\kappa D_{w_1}^{\kappa\top} - D_{w_2}^\kappa D_{w_2}^{\kappa\top}\|_2 \\
 &\leq \|A_{w_1}^{\kappa\top} C_{w_1}^{\kappa-1} A_{w_1}^\kappa - A_{w_2}^{\kappa\top} C_{w_2}^{\kappa-1} A_{w_2}^\kappa\|_2 + \|D_{w_1}^\kappa D_{w_1}^{\kappa\top} - D_{w_2}^\kappa D_{w_2}^{\kappa\top}\|_2 \\
 &= \|A_{w_1}^{\kappa\top} C_{w_1}^{\kappa-1} (C_{w_2}^\kappa - C_{w_1}^\kappa) C_{w_2}^{\kappa-1} A_{w_1}^\kappa + (A_{w_1}^\kappa - A_{w_2}^\kappa)^\top C_{w_2}^{\kappa-1} A_{w_1}^\kappa + A_{w_2}^{\kappa\top} C_{w_2}^{\kappa-1} (A_{w_1}^\kappa - A_{w_2}^\kappa)\|_2 \\
 &\quad + \|D_{w_1}^\kappa (D_{w_1}^\kappa - D_{w_2}^\kappa)^\top + (D_{w_1}^\kappa - D_{w_2}^\kappa) D_{w_2}^{\kappa\top}\|_2 \\
 &\leq \|A_{w_1}^{\kappa\top} C_{w_1}^{\kappa-1} (C_{w_2}^\kappa - C_{w_1}^\kappa) C_{w_2}^{\kappa-1} A_{w_1}^\kappa\|_2 + \|(A_{w_1}^\kappa - A_{w_2}^\kappa)^\top C_{w_2}^{\kappa-1} A_{w_1}^\kappa\|_2 + \|A_{w_2}^{\kappa\top} C_{w_2}^{\kappa-1} (A_{w_1}^\kappa - A_{w_2}^\kappa)\|_2 \\
 &\quad + \|D_{w_1}^\kappa (D_{w_1}^\kappa - D_{w_2}^\kappa)^\top\|_2 + \|(D_{w_1}^\kappa - D_{w_2}^\kappa) D_{w_2}^{\kappa\top}\|_2 \\
 &\leq \left( \frac{L_C^\kappa (C_A^\kappa)^2 + 2C_A^\kappa \lambda_C^\kappa L_C^\kappa}{(\lambda_C^\kappa)^2} + C_D^\kappa L_D^\kappa \right) \|w_1 - w_2\|_2 \\
 &= L_F^\kappa \|w_1 - w_2\|_2,
 \end{aligned} \tag{49}$$

where

$$L_F^\kappa = \frac{L_C^\kappa (C_A^\kappa)^2 + 2C_A^\kappa \lambda_C^\kappa L_C^\kappa}{(\lambda_C^\kappa)^2} + C_D^\kappa L_D^\kappa.$$

For  $\|G_{w_1}^\kappa - G_{w_2}^\kappa\|_2$ , we have

$$\begin{aligned}
 &\|G_{w_1}^\kappa - G_{w_2}^\kappa\|_2 \\
 &= \|A_{w_1}^{\kappa\top} C_{w_1}^{\kappa-1} E_{w_1}^\kappa - A_{w_2}^{\kappa\top} C_{w_2}^{\kappa-1} E_{w_2}^\kappa + D_{w_1}^\kappa - D_{w_2}^\kappa\|_2 \\
 &\leq \|A_{w_1}^{\kappa\top} C_{w_1}^{\kappa-1} E_{w_1}^\kappa - A_{w_2}^{\kappa\top} C_{w_2}^{\kappa-1} E_{w_2}^\kappa\|_2 + \|D_{w_1}^\kappa - D_{w_2}^\kappa\|_2 \\
 &= \|A_{w_1}^{\kappa\top} C_{w_1}^{\kappa-1} (C_{w_2}^\kappa - C_{w_1}^\kappa) C_{w_2}^{\kappa-1} E_{w_1}^\kappa + (A_{w_1}^\kappa - A_{w_2}^\kappa)^\top C_{w_2}^{\kappa-1} E_{w_1}^\kappa + A_{w_2}^{\kappa\top} C_{w_2}^{\kappa-1} (E_{w_1}^\kappa - E_{w_2}^\kappa)\|_2 + \|D_{w_1}^\kappa - D_{w_2}^\kappa\|_2 \\
 &\leq \left( \frac{L_C^\kappa C_A^\kappa C_E^\kappa + C_E^\kappa \lambda_C^\kappa L_A^\kappa + C_A^\kappa \lambda_C^\kappa L_E^\kappa}{(\lambda_C^\kappa)^2} + L_D^\kappa \right) \|w_1 - w_2\|_2 \\
 &= L_G^\kappa \|w_1 - w_2\|_2,
 \end{aligned} \tag{50}$$

where

$$L_G^\kappa = \frac{L_C^\kappa C_A^\kappa C_E^\kappa + C_E^\kappa \lambda_C^\kappa L_A^\kappa + C_A^\kappa \lambda_C^\kappa L_E^\kappa}{(\lambda_C^\kappa)^2} + L_D^\kappa.$$

We next prove the Lipschitz property for  $\theta_\rho^*$ . To bound  $\|\theta_{\rho, w_1}^{*\top} - \theta_{\rho, w_2}^{*\top}\|_2$ , we proceed as follows.

$$\begin{aligned}
 \theta_{\rho, w_1}^{*\top} - \theta_{\rho, w_2}^{*\top} &= F_{w_1}^{\kappa-1} G_{w_1}^\kappa - F_{w_2}^{\kappa-1} G_{w_2}^\kappa = (F_{w_1}^{\kappa-1} - F_{w_2}^{\kappa-1}) G_{w_1}^\kappa + F_{w_2}^{\kappa-1} (G_{w_1}^\kappa - G_{w_2}^\kappa) \\
 &= (F_{w_1}^{\kappa-1} F_{w_2}^\kappa F_{w_2}^{\kappa-1} - F_{w_1}^{\kappa-1} F_{w_1}^\kappa F_{w_2}^{\kappa-1}) G_{w_1}^\kappa + F_{w_2}^{\kappa-1} (G_{w_1}^\kappa - G_{w_2}^\kappa) \\
 &= F_{w_1}^{\kappa-1} (F_{w_2}^\kappa - F_{w_1}^\kappa) F_{w_2}^{\kappa-1} G_{w_1}^\kappa + F_{w_2}^{\kappa-1} (G_{w_1}^\kappa - G_{w_2}^\kappa),
 \end{aligned} \tag{51}$$

which implies

$$\begin{aligned}
 \|\theta_{\rho,w_1}^{*\top} - \theta_{\rho,w_2}^{*\top}\|_2 &\leq \|F_{w_1}^{\kappa-1}\|_2 \|F_{w_2}^\kappa - F_{w_1}^\kappa\|_2 \|F_{w_2}^{\kappa-1}\|_2 \|G_{w_1}^\kappa\|_2 + \|F_{w_2}^{\kappa-1}\|_2 \|G_{w_1}^\kappa - G_{w_2}^\kappa\|_2 \\
 &\leq \frac{C_G^\kappa}{(\lambda_F^\kappa)^2} \|F_{w_1}^\kappa - F_{w_2}^\kappa\|_2 + \frac{1}{\lambda_F^\kappa} \|G_{w_1}^\kappa - G_{w_2}^\kappa\|_2 \\
 &\leq \frac{C_G^\kappa L_F^\kappa + \lambda_F^\kappa L_G^\kappa}{(\lambda_F^\kappa)^2} \|w_1 - w_2\|_2 = L_\rho \|w_1 - w_2\|_2,
 \end{aligned} \tag{52}$$

where  $L_\rho = \frac{C_G^\kappa L_F^\kappa + \lambda_F^\kappa L_G^\kappa}{(\lambda_F^\kappa)^2}$ .

We then consider the Lipschitz property of  $\theta_q^*$ . To bound  $\|\theta_{q,w_1}^* - \theta_{q,w_2}^{*\top}\|_2$ , we proceed as follows.

$$\begin{aligned}
 \theta_{q,w_1}^* - \theta_{q,w_2}^* &= C_{w_1}^{\kappa-1}(E_{w_1}^\kappa - A_{w_1}^\kappa \theta_{\rho,w_1}^*) - C_{w_2}^{\kappa-1}(E_{w_2}^\kappa - A_{w_2}^\kappa \theta_{\rho,w_2}^*) \\
 &= (C_{w_1}^{\kappa-1} - C_{w_2}^{\kappa-1})(E_{w_1}^\kappa - A_{w_1}^\kappa \theta_{\rho,w_1}^*) + C_{w_2}^{\kappa-1}(E_{w_1}^\kappa - E_{w_2}^\kappa + A_{w_2}^\kappa \theta_{\rho,w_2}^* - A_{w_1}^\kappa \theta_{\rho,w_1}^*) \\
 &= C_{w_1}^{\kappa-1}(C_{w_2}^\kappa - C_{w_1}^\kappa)C_{w_2}^{\kappa-1}(E_{w_1}^\kappa - A_{w_1}^\kappa \theta_{\rho,w_1}^*) \\
 &\quad + C_{w_2}^{\kappa-1}[(E_{w_1}^\kappa - E_{w_2}^\kappa) + A_{w_2}^\kappa(\theta_{\rho,w_2}^* - \theta_{\rho,w_1}^*) + (A_{w_2}^\kappa - A_{w_1}^\kappa)\theta_{\rho,w_1}^*],
 \end{aligned}$$

which implies

$$\begin{aligned}
 \|\theta_{q,w_1}^* - \theta_{q,w_2}^*\|_2 &\leq \|C_{w_1}^{\kappa-1}\|_2 \|C_{w_2}^\kappa - C_{w_1}^\kappa\|_2 \|C_{w_2}^{\kappa-1}\|_2 (\|E_{w_1}^\kappa\|_2 + \|A_{w_1}^\kappa\|_2 \|\theta_{\rho,w_1}^*\|_2) \\
 &\quad + \|C_{w_2}^{\kappa-1}\|_2 [\|E_{w_1}^\kappa - E_{w_2}^\kappa\|_2 + \|A_{w_2}^\kappa\|_2 \|\theta_{\rho,w_2}^* - \theta_{\rho,w_1}^*\|_2 + \|A_{w_2}^\kappa - A_{w_1}^\kappa\|_2 \|\theta_{\rho,w_1}^*\|_2] \\
 &\leq \left[ \frac{L_C^\kappa (C_E^\kappa + C_A^\kappa R_\rho) + \lambda_C^\kappa (L_E^\kappa + C_A^\kappa L_\rho + L_A^\kappa R_\rho)}{(\lambda_C^\kappa)^2} \right] \|w_1 - w_2\|_2 = L_q \|w_1 - w_2\|_2,
 \end{aligned}$$

where  $L_q = \frac{L_C^\kappa (C_E^\kappa + C_A^\kappa R_\rho) + \lambda_C^\kappa (L_E^\kappa + C_A^\kappa L_\rho + L_A^\kappa R_\rho)}{(\lambda_C^\kappa)^2}$ .

Finally, we consider the Lipschitz property of  $\eta^*$ . To bound  $\|\eta_{w_1}^* - \eta_{w_2}^*\|_2$ , we proceed as follows

$$\begin{aligned}
 \|\eta_{w_1}^* - \eta_{w_2}^*\|_2 &= \|D_{w_1}^\kappa \theta_{\rho,w_1}^* - D_{w_2}^\kappa \theta_{\rho,w_2}^*\|_2 \\
 &= \|D_{w_1}^\kappa (\theta_{\rho,w_1}^* - \theta_{\rho,w_2}^*) + (D_{w_1}^\kappa - D_{w_2}^\kappa) \theta_{\rho,w_2}^*\|_2 \\
 &\leq \|D_{w_1}^\kappa (\theta_{\rho,w_1}^* - \theta_{\rho,w_2}^*)\|_2 + \|(D_{w_1}^\kappa - D_{w_2}^\kappa) \theta_{\rho,w_2}^*\|_2 \\
 &\leq (C_D^\kappa L_\rho + L_D^\kappa R_\rho) \|w_1 - w_2\|_2 = L_\eta \|w_1 - w_2\|_2,
 \end{aligned} \tag{53}$$

where  $L_\eta = C_D^\kappa L_\rho + L_D^\kappa R_\rho$ .  $\square$

**Lemma 5.** Consider the policies  $\pi_{w_1}$  and  $\pi_{w_2}$ , respectively, with the fixed points  $\xi_1^*$  and  $\xi_2^*$  defined in eq. (46). We have

$$\|\xi_1^* - \xi_2^*\|_2 \leq L_\xi \|w_1 - w_2\|_2,$$

where  $L_\xi = \frac{2C_\varphi^\xi C_b^\xi L_\pi + \lambda_A^\xi C_\varphi (C_{sc} L_\pi + L_{sc})}{(\lambda_A^\xi)^2}$ .

*Proof.* Recall that for  $k = 1$  or  $2$ , we have  $\xi_k^* = P_k^{-1} p_k = [\theta_{\psi,w_k}^{*\top}, 0^\top]^\top$ , where  $\theta_{\psi,w_k}^{*\top} = A_{w_k}^{\xi-1} b_{w_k}^\xi$ , with  $A_{w_k}^\xi = \mathbb{E}_{\tilde{\mathcal{D}}_d \cdot \pi_w} [(\varphi - \varphi') \varphi'^\top]$  and  $b_{w_k}^\xi = \mathbb{E}_{\tilde{\mathcal{D}}_d \cdot \pi_w} [\varphi' \nabla_w \log \pi_w(a'|s')]$ , which implies that

$$\|\xi_1^* - \xi_2^*\|_2 = \|\theta_{\psi,w_1}^{*\top} - \theta_{\psi,w_2}^{*\top}\|_2.$$

To bound  $\left\| \theta_{\psi, w_1}^{*\top} - \theta_{\psi, w_2}^{*\top} \right\|_2$ , following the steps similar to those in eq. (51) and eq. (52), we obtain

$$\left\| \theta_{\psi, w_1}^{*\top} - \theta_{\psi, w_2}^{*\top} \right\|_2 \leq \frac{C_b^\xi}{(\lambda_A^\xi)^2} \|A_{w_1}^\xi - A_{w_2}^\xi\|_2 + \frac{1}{\lambda_A^\xi} \|b_{w_1}^\xi - b_{w_2}^\xi\|_2. \quad (54)$$

We first bound the term  $\|A_{w_2}^\xi - A_{w_1}^\xi\|_2$ . Following the steps similar to those in eq. (47), we obtain

$$\|A_{w_2}^\xi - A_{w_1}^\xi\|_2 \leq 2C_\varphi^2 L_\pi \|w_1 - w_2\|_2. \quad (55)$$

We then bound the term  $\|b_{w_1}^\xi - b_{w_2}^\xi\|_2$ . Based on the definition of  $b_w^\xi$ , we have

$$\begin{aligned} & \|b_{w_1}^\xi - b_{w_2}^\xi\|_2 \\ &= \left\| \mathbb{E}_{\tilde{\mathcal{D}}_{d, \pi_{w_1}}} [\varphi' \nabla_w \log \pi_{w_1}(a'|s')] - \mathbb{E}_{\tilde{\mathcal{D}}_{d, \pi_{w_2}}} [\varphi' \nabla_w \log \pi_{w_2}(a'|s')] \right\|_2 \\ &\leq \left\| \mathbb{E}_{\tilde{\mathcal{D}}_{d, \pi_{w_1}}} [\varphi' \nabla_w \log \pi_{w_1}(a'|s')] - \mathbb{E}_{\tilde{\mathcal{D}}_{d, \pi_{w_2}}} [\varphi' \nabla_w \log \pi_{w_1}(a'|s')] \right\|_2 \\ &\quad + \left\| \mathbb{E}_{\tilde{\mathcal{D}}_{d, \pi_{w_2}}} [\varphi' \nabla_w \log \pi_{w_1}(a'|s')] - \mathbb{E}_{\tilde{\mathcal{D}}_{d, \pi_{w_2}}} [\varphi' \nabla_w \log \pi_{w_2}(a'|s')] \right\|_2 \\ &= \left\| \int \varphi(s', a') \nabla_w \log \pi_{w_1}(a'|s') (\pi_{w_1}(da'|s') - \pi_{w_2}(da'|s')) \tilde{\mathcal{P}}(ds'|s, a) \mathcal{D}(ds, da) \right\|_2 \\ &\quad + \left\| \int \varphi(s', a') (\nabla_w \log \pi_{w_1}(a'|s') - \nabla_w \log \pi_{w_2}(a'|s')) \pi_{w_2}(da'|s') \tilde{\mathcal{P}}(ds'|s, a) \mathcal{D}(ds, da) \right\|_2 \\ &= \int \|\varphi(s', a') \nabla_w \log \pi_{w_1}(a'|s')\|_2 |\pi_{w_1}(da'|s') - \pi_{w_2}(da'|s')| \tilde{\mathcal{P}}(ds'|s, a) \mathcal{D}(ds, da) \\ &\quad + \int \|\varphi(s', a')\|_2 \|\nabla_w \log \pi_{w_1}(a'|s') - \nabla_w \log \pi_{w_2}(a'|s')\|_2 \pi_{w_2}(da'|s') \tilde{\mathcal{P}}(ds'|s, a) \mathcal{D}(ds, da) \\ &\leq C_\varphi C_{sc} \int |\pi_{w_1}(da'|s') - \pi_{w_2}(da'|s')| \tilde{\mathcal{P}}(ds'|s, a) \mathcal{D}(ds, da) + C_\varphi L_{sc} \|w_1 - w_2\|_2 \\ &\leq C_\varphi (C_{sc} L_\pi + L_{sc}) \|w_1 - w_2\|_2. \end{aligned} \quad (56)$$

Substituting eq. (55) and eq. (56) into eq. (52) yields

$$\left\| \theta_{\psi, w_1}^{*\top} - \theta_{\psi, w_2}^{*\top} \right\|_2 \leq \frac{2C_\varphi^2 C_b^\xi L_\pi + \lambda_A^\xi C_\varphi (C_{sc} L_\pi + L_{sc})}{(\lambda_A^\xi)^2} \|w_1 - w_2\|_2 = L_\xi \|w_1 - w_2\|_2.$$

Thus, we have  $\|\xi_1^* - \xi_2^*\|_2 \leq L_\xi \|w_1 - w_2\|_2$ , which completes the proof.  $\square$

**Lemma 6.** Consider the policies  $\pi_{w_1}$  and  $\pi_{w_2}$ , respectively, with the fixed points  $\zeta_1^*$  and  $\zeta_2^*$  defined in eq. (40). Then, we have

$$\|\zeta_1^* - \zeta_2^*\|_2 \leq L_\zeta \|w_1 - w_2\|_2,$$

where  $L_\zeta = \frac{2C_x^2 L_\pi C_b^\zeta + \lambda_A^\zeta C_\phi C_x (R_q L_{sc} + L_q C_{sc}) + \lambda_A^\zeta C_\phi R_q C_x C_{sc} L_\pi}{(\lambda_A^\zeta)^2}$ .

*Proof.* Recall that for  $k = 1$  or  $2$ , we have  $\zeta_k^* = U_k^{-1} u_k(\theta_{q,k}^*) = [\theta_{d_q, k}^{*\top}, 0^\top]^\top$ , where  $\theta_{d_q, k}^{*\top} = A_{w_k}^{\zeta_k^*} b_{w_k}^{\zeta_k^*}$ , with  $A_w^\zeta = \mathbb{E}_{\mathcal{D}_{d, \pi_w}} [(\gamma x(s', a') - x(s, a)) x(s, a)^\top]$  and  $b_w^\zeta = \mathbb{E}_{\mathcal{D}_{d, \pi_w}} [\phi(s', a')^\top \theta_{q, w}^* x(s, a) \nabla_w \log \pi_w(a'|s')]$ , which implies that

$$\|\zeta_1^* - \zeta_2^*\|_2 = \left\| \theta_{d_q, 1}^{*\top} - \theta_{d_q, 2}^{*\top} \right\|_2.$$

To bound  $\left\| \theta_{d_q, 1}^{*\top} - \theta_{d_q, 2}^{*\top} \right\|_2$ , following the steps similar to those in eq. (51) and eq. (52), we obtain

$$\left\| \theta_{d_q, 1}^{*\top} - \theta_{d_q, 2}^{*\top} \right\|_2 \leq \frac{C_b^\zeta}{(\lambda_A^\zeta)^2} \|A_{w_1}^\zeta - A_{w_2}^\zeta\|_2 + \frac{1}{\lambda_A^\zeta} \|b_{w_1}^\zeta - b_{w_2}^\zeta\|_2. \quad (57)$$

We first bound the term  $\|A_{w_1}^\zeta - A_{w_2}^\zeta\|_2$ . Following the steps similar to those in eq. (47), we obtain

$$\|A_{w_1}^\zeta - A_{w_2}^\zeta\|_2 \leq 2C_x^2 L_\pi \|w_1 - w_2\|_2. \quad (58)$$

We then bound the term  $\|b_{w_1}^\zeta - b_{w_2}^\zeta\|_2$ . Based on to the definition of  $b_w^\zeta$ , we have

$$\begin{aligned} & \|b_{w_1}^\zeta - b_{w_2}^\zeta\|_2 \\ &= \left\| \mathbb{E}_{\mathcal{D}_{d \cdot \pi_{w_1}}} [\phi(s', a')^\top \theta_{q, w_1}^* x(s, a) \nabla_w \log \pi_{w_1}(a' | s')] - \mathbb{E}_{\mathcal{D}_{d \cdot \pi_{w_2}}} [\phi(s', a')^\top \theta_{q, w_2}^* x(s, a) \nabla_w \log \pi_{w_2}(a' | s')] \right\|_2 \\ &\leq \left\| \mathbb{E}_{\mathcal{D}_{d \cdot \pi_{w_1}}} [\phi(s', a')^\top \theta_{q, w_1}^* x(s, a) \nabla_w \log \pi_{w_1}(a' | s')] - \mathbb{E}_{\mathcal{D}_{d \cdot \pi_{w_2}}} [\phi(s', a')^\top \theta_{q, w_1}^* x(s, a) \nabla_w \log \pi_{w_1}(a' | s')] \right\|_2 \\ &\quad + \left\| \mathbb{E}_{\mathcal{D}_{d \cdot \pi_{w_2}}} [\phi(s', a')^\top \theta_{q, w_1}^* x(s, a) \nabla_w \log \pi_{w_1}(a' | s')] - \mathbb{E}_{\mathcal{D}_{d \cdot \pi_{w_2}}} [\phi(s', a')^\top \theta_{q, w_2}^* x(s, a) \nabla_w \log \pi_{w_2}(a' | s')] \right\|_2 \\ &\leq \left\| \mathbb{E}_{\mathcal{D}_{d \cdot \pi_{w_2}}} [\phi(s', a')^\top \theta_{q, w_1}^* x(s, a) \nabla_w \log \pi_{w_1}(a' | s')] - \mathbb{E}_{\mathcal{D}_{d \cdot \pi_{w_2}}} [\phi(s', a')^\top \theta_{q, w_2}^* x(s, a) \nabla_w \log \pi_{w_2}(a' | s')] \right\|_2 \\ &\quad + C_\phi R_q C_x C_{sc} L_\pi \|w_1 - w_2\|_2. \end{aligned} \quad (59)$$

Consider the term

$$\left\| \mathbb{E}_{\mathcal{D}_{d \cdot \pi_{w_2}}} [\phi(s', a')^\top \theta_{q, w_1}^* x(s, a) \nabla_w \log \pi_{w_1}(a' | s')] - \mathbb{E}_{\mathcal{D}_{d \cdot \pi_{w_2}}} [\phi(s', a')^\top \theta_{q, w_2}^* x(s, a) \nabla_w \log \pi_{w_2}(a' | s')] \right\|_2,$$

we have

$$\begin{aligned} & \left\| \mathbb{E}_{\mathcal{D}_{d \cdot \pi_{w_2}}} [\phi(s', a')^\top \theta_{q, w_1}^* x(s, a) \nabla_w \log \pi_{w_1}(a' | s')] - \mathbb{E}_{\mathcal{D}_{d \cdot \pi_{w_2}}} [\phi(s', a')^\top \theta_{q, w_2}^* x(s, a) \nabla_w \log \pi_{w_2}(a' | s')] \right\|_2 \\ &\leq \left\| \mathbb{E}_{\mathcal{D}_{d \cdot \pi_{w_2}}} [\phi(s', a')^\top \theta_{q, w_1}^* x(s, a) (\nabla_w \log \pi_{w_1}(a' | s') - \nabla_w \log \pi_{w_2}(a' | s'))] \right\|_2 \\ &\quad + \left\| \mathbb{E}_{\mathcal{D}_{d \cdot \pi_{w_2}}} [\phi(s', a')^\top (\theta_{q, w_1}^* - \theta_{q, w_2}^*) x(s, a) \nabla_w \log \pi_{w_2}(a' | s')] \right\|_2 \\ &\stackrel{(i)}{\leq} C_\phi C_x (R_q L_{sc} + L_q C_{sc}) \|w_1 - w_2\|_2, \end{aligned} \quad (60)$$

where (i) follows from the Lipschitz property of  $\theta_{q, w}^*$  given in Lemma 4. Combining eq. (47), eq. (59), eq. (60) and eq. (57) yields

$$\left\| \theta_{d_q, w_1}^{*\top} - \theta_{d_q, w_2}^{*\top} \right\|_2 \leq \frac{2C_x^2 L_\pi C_b^\zeta + \lambda_A^\zeta C_\phi C_x (R_q L_{sc} + L_q C_{sc}) + \lambda_A^\zeta C_\phi R_q C_x C_{sc} L_\pi}{(\lambda_A^\zeta)^2} \|w_1 - w_2\|_2 = L_\zeta \|w_1 - w_2\|_2.$$

Thus we have  $\|\zeta_1^* - \zeta_2^*\|_2 \leq L_\zeta \|w_1 - w_2\|_2$ , which completes the proof.  $\square$

**Lemma 7.** Define  $\Delta_t = \|\kappa_t - \kappa_t^*\|_2^2 + \|\xi_t - \xi_t^*\|_2^2 + \|\zeta_t - \zeta_t^*\|_2^2$ . Then, we have

$$\mathbb{E}[\Delta_{t+1} | \mathcal{F}_t] \leq \left(1 - \frac{1}{2}\varrho\right) \Delta_t + \frac{2}{\varrho} (L_\kappa^2 + L_\xi^2 + L_\zeta^2) \mathbb{E}[\|w_{t+1} - w_t\|_2^2 | \mathcal{F}_t] + \frac{C_5}{(1 - \varrho)N},$$

where  $\varrho = \frac{1}{4} \min\{\beta_1 \lambda_M, \beta_2 \lambda_P, \beta_3 \lambda_U\}$  and  $C_5 = C_1 + C_2 + C_4$ , where  $C_1$ ,  $C_2$  and  $C_4$  are defined in Lemma 1, Lemma 2, and Lemma 3.

*Proof.* Following from the iteration property developed in Lemma 1, Lemma 2, and Lemma 3, we have

$$\mathbb{E} \left[ \|\kappa_{t+1} - \kappa_t^*\|_2^2 | \mathcal{F}_t \right] \leq \left(1 - \frac{1}{2}\beta_1 \lambda_M\right) \|\kappa_t - \kappa_t^*\|_2^2 + \frac{C_1}{N}, \quad (61)$$

$$\mathbb{E} \left[ \|\xi_{t+1} - \xi_t^*\|_2^2 | \mathcal{F}_t \right] \leq \left(1 - \frac{1}{2}\beta_2 \lambda_P\right) \|\xi_t - \xi_t^*\|_2^2 + \frac{C_2}{N}, \quad (62)$$

$$\begin{aligned} \mathbb{E} \left[ \|\zeta_{t+1} - \zeta_t^*\|_2^2 | \mathcal{F}_t \right] &\leq \left(1 - \frac{1}{4}\beta_3 \lambda_U\right) \|\zeta_t - \zeta_t^*\|_2^2 + C_3 \beta_3 \|\theta_{q, t} - \theta_{q, t}^*\|_2^2 + \frac{C_4}{N} \\ &\leq \left(1 - \frac{1}{4}\beta_3 \lambda_U\right) \|\zeta_t - \zeta_t^*\|_2^2 + C_3 \beta_3 \|\kappa_t - \kappa_t^*\|_2^2 + \frac{C_4}{N}. \end{aligned} \quad (63)$$

Summarizing eq. (61), eq. (62) and eq. (63), we obtain

$$\begin{aligned} & \mathbb{E} \left[ \|\kappa_{t+1} - \kappa_t^*\|_2^2 | \mathcal{F}_t \right] + \mathbb{E} \left[ \|\xi_{t+1} - \xi_t^*\|_2^2 | \mathcal{F}_t \right] + \mathbb{E} \left[ \|\zeta_{t+1} - \zeta_t^*\|_2^2 | \mathcal{F}_t \right] \\ & \leq \left( 1 - \frac{1}{2} \beta_1 \lambda_M + C_3 \beta_3 \right) \|\kappa_t - \kappa_t^*\|_2^2 + \left( 1 - \frac{1}{2} \beta_2 \lambda_P \right) \|\xi_t - \xi_t^*\|_2^2 + \left( 1 - \frac{1}{4} \beta_3 \lambda_U \right) \|\zeta_t - \zeta_t^*\|_2^2 + \frac{C_1 + C_2 + C_4}{N}. \end{aligned}$$

Let  $\beta_3 \leq \frac{\beta_1 \lambda_M}{4C_3}$  and define  $\varrho = \frac{1}{4} \min\{\beta_1 \lambda_M, \beta_2 \lambda_P, \beta_3 \lambda_U\}$ ,  $C_5 = C_1 + C_2 + C_4$ . Then, we have

$$\begin{aligned} & \mathbb{E} \left[ \|\kappa_{t+1} - \kappa_t^*\|_2^2 | \mathcal{F}_t \right] + \mathbb{E} \left[ \|\xi_{t+1} - \xi_t^*\|_2^2 | \mathcal{F}_t \right] + \mathbb{E} \left[ \|\zeta_{t+1} - \zeta_t^*\|_2^2 | \mathcal{F}_t \right] \\ & \leq (1 - \varrho) \left( \|\kappa_t - \kappa_t^*\|_2^2 + \|\xi_t - \xi_t^*\|_2^2 + \|\zeta_t - \zeta_t^*\|_2^2 \right) + \frac{C_5}{N}. \end{aligned} \quad (64)$$

We then proceed to investigate the iteration of  $\Delta_t$ . By Young's inequality, we have

$$\begin{aligned} \Delta_{t+1} & \leq \left( \frac{2 - \varrho}{2 - 2\varrho} \right) \left( \mathbb{E} \left[ \|\kappa_{t+1} - \kappa_t^*\|_2^2 | \mathcal{F}_t \right] + \mathbb{E} \left[ \|\xi_{t+1} - \xi_t^*\|_2^2 | \mathcal{F}_t \right] + \mathbb{E} \left[ \|\zeta_{t+1} - \zeta_t^*\|_2^2 | \mathcal{F}_t \right] \right) \\ & \quad + \left( \frac{2 - \varrho}{\varrho} \right) \left( \mathbb{E} \left[ \|\kappa_{t+1}^* - \kappa_t^*\|_2^2 | \mathcal{F}_t \right] + \mathbb{E} \left[ \|\xi_{t+1}^* - \xi_t^*\|_2^2 | \mathcal{F}_t \right] + \mathbb{E} \left[ \|\zeta_{t+1}^* - \zeta_t^*\|_2^2 | \mathcal{F}_t \right] \right) \\ & \stackrel{(i)}{\leq} \left( 1 - \frac{1}{2} \varrho \right) \Delta_t + \frac{2}{\varrho} \left( \mathbb{E} \left[ \|\kappa_{t+1}^* - \kappa_t^*\|_2^2 | \mathcal{F}_t \right] + \mathbb{E} \left[ \|\xi_{t+1}^* - \xi_t^*\|_2^2 | \mathcal{F}_t \right] + \mathbb{E} \left[ \|\zeta_{t+1}^* - \zeta_t^*\|_2^2 | \mathcal{F}_t \right] \right) + \frac{C_5}{(1 - \varrho)N} \\ & \leq \left( 1 - \frac{1}{2} \varrho \right) \Delta_t + \frac{2}{\varrho} (L_\kappa^2 + L_\xi^2 + L_\zeta^2) \mathbb{E} \left[ \|w_{t+1} - w_t\|_2^2 | \mathcal{F}_t \right] + \frac{C_5}{(1 - \varrho)N}. \end{aligned} \quad (65)$$

where (i) follows from eq. (64).  $\square$

## D. Proof of Theorem 2

In order to prove the convergence for the DR-Off-PAC algorithm, we first introduce the following Lipschitz property of  $J(w)$ , which was established in (Xu et al., 2020b).

**Proposition 1.** *Suppose Assumptions 2 and 3 hold. For any  $w, w' \in \mathbb{R}^d$ , we have  $\|\nabla_w J(w) - \nabla_w J(w')\|_2 \leq L_J \|w - w'\|_2$ , for all  $w, w' \in \mathbb{R}^d$ , where  $L_J = \Theta(1/(1 - \gamma))$ .*

The Lipschitz property established in Proposition 1 is important to establish the local convergence of the gradient-based algorithm.

To proceed the proof of Theorem 2, consider the update in Algorithm 1. For brevity, we define  $G_{\text{DR}}(w_t, \mathcal{M}_t) = \frac{1}{N} \sum_i G_{\text{DR}}^i(w_t)$ , where  $\mathcal{M}_t$  represents the sample set  $\mathcal{B}_t \cup \mathcal{B}_{t,0}$ . Following the  $L_J$ -Lipschitz property of objective  $J(w)$ , we have

$$\begin{aligned} J(w_{t+1}) & \geq J(w_t) + \langle \nabla_w J(w_t), w_{t+1} - w_t \rangle - \frac{L_J}{2} \|w_{t+1} - w_t\|_2^2 \\ & = J(w_t) + \alpha \langle \nabla_w J(w_t), G_{\text{DR}}(w_t, \mathcal{M}_t) - \nabla_w J(w_t) + \nabla_w J(w_t) \rangle - \frac{L_J \alpha^2}{2} \|G_{\text{DR}}(w_t, \mathcal{M}_t)\|_2^2 \\ & = J(w_t) + \alpha \|\nabla_w J(w_t)\|_2^2 + \alpha \langle \nabla_w J(w_t), G_{\text{DR}}(w_t, \mathcal{M}_t) - \nabla_w J(w_t) \rangle \\ & \quad - \frac{L_J \alpha^2}{2} \|G_{\text{DR}}(w_t, \mathcal{M}_t) - \nabla_w J(w_t) + \nabla_w J(w_t)\|_2^2 \\ & \stackrel{(i)}{\geq} J(w_t) + \left( \frac{1}{2} \alpha - L_J \alpha^2 \right) \|\nabla_w J(w_t)\|_2^2 - \left( \frac{1}{2} \alpha + L_J \alpha^2 \right) \|G_{\text{DR}}(w_t, \mathcal{M}_t) - \nabla_w J(w_t)\|_2^2, \end{aligned} \quad (66)$$

where (i) follows because

$$\langle \nabla_w J(w_t), G_{\text{DR}}(w_t, \mathcal{M}_t) - \nabla_w J(w_t) \rangle \geq -\frac{1}{2} \|\nabla_w J(w_t)\|_2^2 - \frac{1}{2} \|G_{\text{DR}}(w_t, \mathcal{M}_t) - \nabla_w J(w_t)\|_2^2,$$

and

$$\|G_{\text{DR}}(w_t, \mathcal{M}_t) - \nabla_w J(w_t) + \nabla_w J(w_t)\|_2^2 \leq 2 \|G_{\text{DR}}(w_t, \mathcal{M}_t) - \nabla_w J(w_t)\|_2^2 + 2 \|\nabla_w J(w_t)\|_2^2.$$

Taking the expectation on both sides of eq. (66) conditioned on  $\mathcal{F}_t$  and rearranging eq. (66) yield

$$\begin{aligned} & \left(\frac{1}{2}\alpha - L_J\alpha^2\right)\mathbb{E}[\|\nabla_w J(w_t)\|_2^2 | \mathcal{F}_t] \\ & \leq \mathbb{E}[J(w_{t+1}) | \mathcal{F}_t] - J(w_t) + \left(\frac{1}{2}\alpha + L_J\alpha^2\right)\mathbb{E}[\|G_{\text{DR}}(w_t, \mathcal{M}_t) - \nabla_w J(w_t)\|_2^2 | \mathcal{F}_t]. \end{aligned} \quad (67)$$

Then, we upper-bound the term  $\mathbb{E}[\|G_{\text{DR}}(w_t, \mathcal{M}_t) - \nabla_w J(w_t)\|_2^2 | \mathcal{F}_t]$  as follows. By definition, we have

$$\begin{aligned} & \|G_{\text{DR}}(w_t, \mathcal{M}_t) - \nabla_w J(w_t)\|_2^2 \\ & = \|G_{\text{DR}}(w_t, \theta_{q,t}, \theta_{\rho,t}, \theta_{\psi,t}, \theta_{d_q,t}, \mathcal{M}_t) - \nabla_w J(w_t)\|_2^2 \\ & \leq 6 \left\| G_{\text{DR}}(w_t, \theta_{q,t}, \theta_{\rho,t}, \theta_{\psi,t}, \theta_{d_q,t}, \mathcal{M}_t) - G_{\text{DR}}(w_t, \theta_{q,t}, \theta_{\rho,t}, \theta_{\psi,t}, \theta_{d_q,t}^*, \mathcal{M}_t) \right\|_2^2 \\ & \quad + 6 \left\| G_{\text{DR}}(w_t, \theta_{q,t}, \theta_{\rho,t}, \theta_{\psi,t}, \theta_{d_q,t}^*, \mathcal{M}_t) - G_{\text{DR}}(w_t, \theta_{q,t}, \theta_{\rho,t}, \theta_{\psi,t}^*, \theta_{d_q,t}^*, \mathcal{M}_t) \right\|_2^2 \\ & \quad + 6 \left\| G_{\text{DR}}(w_t, \theta_{q,t}, \theta_{\rho,t}, \theta_{\psi,t}^*, \theta_{d_q,t}^*, \mathcal{M}_t) - G_{\text{DR}}(w_t, \theta_{q,t}^*, \theta_{\rho,t}, \theta_{\psi,t}^*, \theta_{d_q,t}^*, \mathcal{M}_t) \right\|_2^2 \\ & \quad + 6 \left\| G_{\text{DR}}(w_t, \theta_{q,t}^*, \theta_{\rho,t}, \theta_{\psi,t}^*, \theta_{d_q,t}^*, \mathcal{M}_t) - G_{\text{DR}}(w_t, \theta_{q,t}^*, \theta_{\rho,t}^*, \theta_{\psi,t}^*, \theta_{d_q,t}^*, \mathcal{M}_t) \right\|_2^2 \\ & \quad + 6 \left\| G_{\text{DR}}(w_t, \theta_{q,t}^*, \theta_{\rho,t}^*, \theta_{\psi,t}^*, \theta_{d_q,t}^*, \mathcal{M}_t) - \mathbb{E}[G_{\text{DR}}^i(w_t, \theta_{q,t}^*, \theta_{\rho,t}^*, \theta_{\psi,t}^*, \theta_{d_q,t}^*)] \right\|_2^2 \\ & \quad + 6 \left\| \mathbb{E}[G_{\text{DR}}^i(w_t, \theta_{q,t}^*, \theta_{\rho,t}^*, \theta_{\psi,t}^*, \theta_{d_q,t}^*)] - \nabla_w J(w_t) \right\|_2^2 \\ & \leq \frac{6}{N} \sum_i \left\| G_{\text{DR}}^i(w_t, \theta_{q,t}, \theta_{\rho,t}, \theta_{\psi,t}, \theta_{d_q,t}) - G_{\text{DR}}^i(w_t, \theta_{q,t}, \theta_{\rho,t}, \theta_{\psi,t}, \theta_{d_q,t}^*) \right\|_2^2 \\ & \quad + \frac{6}{N} \sum_i \left\| G_{\text{DR}}^i(w_t, \theta_{q,t}, \theta_{\rho,t}, \theta_{\psi,t}, \theta_{d_q,t}^*) - G_{\text{DR}}^i(w_t, \theta_{q,t}, \theta_{\rho,t}, \theta_{\psi,t}^*, \theta_{d_q,t}^*) \right\|_2^2 \\ & \quad + \frac{6}{N} \sum_i \left\| G_{\text{DR}}^i(w_t, \theta_{q,t}, \theta_{\rho,t}, \theta_{\psi,t}^*, \theta_{d_q,t}^*) - G_{\text{DR}}^i(w_t, \theta_{q,t}^*, \theta_{\rho,t}, \theta_{\psi,t}^*, \theta_{d_q,t}^*) \right\|_2^2 \\ & \quad + \frac{6}{N} \sum_i \left\| G_{\text{DR}}^i(w_t, \theta_{q,t}^*, \theta_{\rho,t}, \theta_{\psi,t}^*, \theta_{d_q,t}^*) - G_{\text{DR}}^i(w_t, \theta_{q,t}^*, \theta_{\rho,t}^*, \theta_{\psi,t}^*, \theta_{d_q,t}^*) \right\|_2^2 \\ & \quad + 6 \left\| G_{\text{DR}}(w_t, \theta_{q,t}^*, \theta_{\rho,t}^*, \theta_{\psi,t}^*, \theta_{d_q,t}^*, \mathcal{M}_t) - \mathbb{E}[G_{\text{DR}}^i(w_t, \theta_{q,t}^*, \theta_{\rho,t}^*, \theta_{\psi,t}^*, \theta_{d_q,t}^*)] \right\|_2^2 \\ & \quad + 6 \left\| \mathbb{E}[G_{\text{DR}}^i(w_t, \theta_{q,t}^*, \theta_{\rho,t}^*, \theta_{\psi,t}^*, \theta_{d_q,t}^*)] - \nabla_w J(w_t) \right\|_2^2. \end{aligned} \quad (68)$$

We next bound each term in eq. (68). For  $\left\| G_{\text{DR}}^i(w_t, \theta_{q,t}, \theta_{\rho,t}, \theta_{\psi,t}, \theta_{d_q,t}) - G_{\text{DR}}^i(w_t, \theta_{q,t}, \theta_{\rho,t}, \theta_{\psi,t}, \theta_{d_q,t}^*) \right\|_2$ , we proceed as follows:

$$\begin{aligned} & \left\| G_{\text{DR}}^i(w_t, \theta_{q,t}, \theta_{\rho,t}, \theta_{\psi,t}, \theta_{d_q,t}) - G_{\text{DR}}^i(w_t, \theta_{q,t}, \theta_{\rho,t}, \theta_{\psi,t}, \theta_{d_q,t}^*) \right\|_2 \\ & \leq (1 - \gamma) \left\| \mathbb{E}_{\pi_{w_t}} [x(s_{0,i}, a_{0,i})]^\top (\theta_{d_q,t} - \theta_{d_q,t}^*) \right\|_2 + \left\| \hat{\rho}_{\pi_{w_t}}(s_i, a_i) x(s_i, a_i) (\theta_{d_q,t}^* - \theta_{d_q,t}) \right\|_2 \\ & \quad + \gamma \left\| \hat{\rho}_{\pi_{w_t}}(s_i, a_i) \mathbb{E}_{\pi_{w_t}} [x(s'_i, a'_i)]^\top (\theta_{d_q,t} - \theta_{d_q,t}^*) \right\|_2 \\ & \leq (1 + 2R_\rho C_\phi) C_x \left\| \theta_{d_q,t}^* - \theta_{d_q,t} \right\|_2 \\ & = C_6 \left\| \theta_{d_q,t}^* - \theta_{d_q,t} \right\|_2, \end{aligned} \quad (69)$$

where  $C_6 = (1 + 2R_\rho C_\phi)$ .

For  $\left\| G_{\text{DR}}^i(w_t, \theta_{q,t}, \theta_{\rho,t}, \theta_{\psi,t}, \theta_{d_q,t}^*) - G_{\text{DR}}^i(w_t, \theta_{q,t}, \theta_{\rho,t}, \theta_{\psi,t}^*, \theta_{d_q,t}^*) \right\|_2$ , we proceed as follows

$$\begin{aligned}
 & \left\| G_{\text{DR}}^i(w_t, \theta_{q,t}, \theta_{\rho,t}, \theta_{\psi,t}, \theta_{d_q,t}^*) - G_{\text{DR}}^i(w_t, \theta_{q,t}, \theta_{\rho,t}, \theta_{\psi,t}^*, \theta_{d_q,t}^*) \right\|_2 \\
 & \leq \left\| \hat{\rho}_{\pi_{w_t}}(s_i, a_i) \varphi(s_i, a_i)^\top (\theta_{\psi,t} - \theta_{\psi,t}^*) \left( r(s_i, a_i, s'_i) + \hat{Q}_{\pi_{w_t}}(s_i, a_i) - \gamma \mathbb{E}_{\pi_{w_t}}[\hat{Q}_{\pi_{w_t}}(s'_i, a'_i)] \right) \right\|_2 \\
 & \leq R_\rho C_\varphi (r_{\max} + 2R_q C_\phi) \left\| \theta_{\psi,t} - \theta_{\psi,t}^* \right\|_2 \\
 & = C_7 \left\| \theta_{\psi,t} - \theta_{\psi,t}^* \right\|_2,
 \end{aligned} \tag{70}$$

where  $C_7 = R_\rho C_\varphi (r_{\max} + 2R_q C_\phi)$ .

For  $\left\| G_{\text{DR}}^i(w_t, \theta_{q,t}, \theta_{\rho,t}, \theta_{\psi,t}^*, \theta_{d_q,t}^*) - G_{\text{DR}}^i(w_t, \theta_{q,t}^*, \theta_{\rho,t}, \theta_{\psi,t}^*, \theta_{d_q,t}^*) \right\|_2$ , we proceed as follows

$$\begin{aligned}
 & \left\| G_{\text{DR}}^i(w_t, \theta_{q,t}, \theta_{\rho,t}, \theta_{\psi,t}^*, \theta_{d_q,t}^*) - G_{\text{DR}}^i(w_t, \theta_{q,t}^*, \theta_{\rho,t}, \theta_{\psi,t}^*, \theta_{d_q,t}^*) \right\|_2 \\
 & \leq (1 - \gamma) \left\| \mathbb{E}_{\pi_{w_t}} [\phi(s_{0,i}, a_{0,i})^\top (\theta_{q,t} - \theta_{q,t}^*) \nabla_w \log \pi_{w_t}(s_{0,i}, a_{0,i})] \right\|_2 \\
 & \quad + \left\| \hat{\rho}_{\pi_{w_t}}(s_i, a_i) \varphi(s_i, a_i)^\top \theta_{\psi,t}^* \phi(s_i, a_i)^\top (\theta_{q,t} - \theta_{q,t}^*) \right\|_2 \\
 & \quad + \gamma \left\| \hat{\rho}_{\pi_{w_t}}(s_i, a_i) \varphi(s_i, a_i)^\top \theta_{\psi,t}^* \mathbb{E}_{\pi_{w_t}} [\phi(s'_i, a'_i)]^\top (\theta_{q,t} - \theta_{q,t}^*) \right\|_2 \\
 & \leq [(1 - \gamma) C_\phi C_{sc} + (1 + \gamma) R_\rho C_\phi^2 C_\varphi R_\psi] \left\| \theta_{q,t} - \theta_{q,t}^* \right\|_2 \\
 & = C_8 \left\| \theta_{q,t} - \theta_{q,t}^* \right\|_2,
 \end{aligned} \tag{71}$$

where  $C_8 = (1 - \gamma) C_\phi C_{sc} + (1 + \gamma) R_\rho C_\phi^2 C_\varphi R_\psi$ .

For  $\left\| G_{\text{DR}}^i(w_t, \theta_{q,t}^*, \theta_{\rho,t}, \theta_{\psi,t}^*, \theta_{d_q,t}^*) - G_{\text{DR}}^i(w_t, \theta_{q,t}^*, \theta_{\rho,t}^*, \theta_{\psi,t}^*, \theta_{d_q,t}^*) \right\|_2$ , we proceed as follows

$$\begin{aligned}
 & \left\| G_{\text{DR}}^i(w_t, \theta_{q,t}^*, \theta_{\rho,t}, \theta_{\psi,t}^*, \theta_{d_q,t}^*) - G_{\text{DR}}^i(w_t, \theta_{q,t}^*, \theta_{\rho,t}^*, \theta_{\psi,t}^*, \theta_{d_q,t}^*) \right\|_2 \\
 & \leq \left\| \phi(s_i, a_i)^\top (\theta_{\rho,t} - \theta_{\rho,t}^*) \varphi(s_i, a_i)^\top \theta_{\psi,t}^* \left( r(s_i, a_i, s'_i) - \phi(s_i, a_i)^\top \theta_{q,t}^* + \gamma \mathbb{E}[\phi(s'_i, a'_i)]^\top \theta_{q,t}^* \right) \right\|_2 \\
 & \quad + \left\| \phi(s_i, a_i)^\top (\theta_{\rho,t} - \theta_{\rho,t}^*) \left( -x(s_i, a_i)^\top \theta_{d_q,t}^* + \gamma \mathbb{E}_{\pi_{w_t}} [\phi(s'_i, a'_i)]^\top \theta_{q,t}^* \nabla_w \log \pi_{w_t}(s'_i, a'_i) + x(s'_i, a'_i)^\top \theta_{d_q,t}^* \right) \right\|_2 \\
 & \leq [C_\phi C_\varphi R_\psi (r_{\max} + (1 + \gamma) C_\phi R_q) + C_\phi (C_x R_{d_q} + \gamma (C_\phi R_q C_{sc} + C_x R_{d_q}))] \left\| \theta_{\rho,t} - \theta_{\rho,t}^* \right\|_2 \\
 & = C_9 \left\| \theta_{\rho,t} - \theta_{\rho,t}^* \right\|_2,
 \end{aligned} \tag{72}$$

where  $C_9 = C_\phi C_\varphi R_\psi (r_{\max} + (1 + \gamma) C_\phi R_q) + C_\phi (C_x R_{d_q} + \gamma (C_\phi R_q C_{sc} + C_x R_{d_q}))$ .

For  $\left\| G_{\text{DR}}(w_t, \theta_{q,t}^*, \theta_{\rho,t}^*, \theta_{\psi,t}^*, \theta_{d_q,t}^*, \mathcal{M}_t) - \mathbb{E}[G_{\text{DR}}^i(w_t, \theta_{q,t}^*, \theta_{\rho,t}^*, \theta_{\psi,t}^*, \theta_{d_q,t}^*)] \right\|_2^2$ , note that for all  $i$ , we have

$$\begin{aligned}
 & \left\| G_{\text{DR}}^i(w_t, \theta_{q,t}^*, \theta_{\rho,t}^*, \theta_{\psi,t}^*, \theta_{d_q,t}^*) \right\|_2 \\
 & \leq (1 - \gamma) \left\| \mathbb{E}_{\pi_w} [\phi_{0,i}^\top \theta_{q,t}^* \nabla_w \log \pi_w(s_{0,i}, a_{0,i}) + x_{0,i}^\top \theta_{d_q,t}^*] \right\|_2 + \left\| \psi_i^\top \theta_{\psi,t}^* \left( r(s_i, a_i, s'_i) - \phi_i^\top \theta_{q,t}^* + \gamma \mathbb{E}_{\pi_{w_t}} [\phi_i'^\top \theta_{q,t}^*] \right) \right\|_2 \\
 & \quad + \left\| \phi_i^\top \theta_{\rho,t}^* \left( -x_i^\top \theta_{d_q,t}^* + \gamma \mathbb{E}_{\pi_w} [\phi_i^\top \theta_{q,t}^* \nabla_w \log \pi_w(s_{t,i}, a_{t,i}) + x_i^\top \theta_{d_q,t}^*] \right) \right\|_2 \\
 & \leq (1 - \gamma) (C_\phi R_q C_{sc} + C_x R_{d_q}) + C_\psi R_\psi (r_{\max} + (1 + \gamma) C_\phi R_q) + C_\phi R_\rho (C_x R_{d_q} + \gamma C_\phi R_q C_{sc} + \gamma C_x R_{d-q}).
 \end{aligned}$$

Let  $C_{10} = (1 - \gamma) (C_\phi R_q C_{sc} + C_x R_{d_q}) + C_\psi R_\psi (r_{\max} + (1 + \gamma) C_\phi R_q) + C_\phi R_\rho (C_x R_{d_q} + \gamma C_\phi R_q C_{sc} + \gamma C_x R_{d-q})$ . Then following the steps similar to those in eq. (34) and eq. (35), we obtain

$$\mathbb{E} \left[ \left\| G_{\text{DR}}(w_t, \theta_{q,t}^*, \theta_{\rho,t}^*, \theta_{\psi,t}^*, \theta_{d_q,t}^*, \mathcal{M}_t) - \mathbb{E}[G_{\text{DR}}^i(w_t, \theta_{q,t}^*, \theta_{\rho,t}^*, \theta_{\psi,t}^*, \theta_{d_q,t}^*)] \right\|_2^2 \middle| \mathcal{F}_t \right] \leq \frac{4C_{10}^2}{N}. \tag{73}$$

Finally, consider the term  $\left\| \mathbb{E}[G_{\text{DR}}^i(w_t, \theta_{q,t}^*, \theta_{\rho,t}^*, \theta_{\psi,t}^*, \theta_{d_q,t}^*)] - \nabla_w J(w_t) \right\|_2^2$ . Following the steps similar to those in proving Theorem 1, we obtain

$$\begin{aligned}
 & \mathbb{E}[G_{\text{DR}}^i(w_t, \theta_{q,t}^*, \theta_{\rho,t}^*, \theta_{\psi,t}^*, \theta_{d_q,t}^*)] - \nabla_w J(w_t) \\
 &= \mathbb{E}_{\mathcal{D}}[(\hat{\rho}_{\pi_{w_t}}(s, a, \theta_{\rho,t}^*) - \rho_{\pi_{w_t}}(s, a))(-\hat{d}_{\pi_{w_t}}^q(s, a, \theta_{d_q,t}^*) + d_{\pi_{w_t}}^q(s, a))] \\
 & \quad + \mathbb{E}_{\mathcal{D}}[(-\hat{d}_{\pi_{w_t}}^q(s, a, \theta_{\rho,t}^*, \theta_{\psi,t}^*) + d_{\pi_{w_t}}^q(s, a))(-\hat{Q}_{\pi_{w_t}}(s, a, \theta_{q,t}^*) + Q_{\pi_{w_t}}(s, a))] \\
 & \quad + \gamma \mathbb{E}_{\mathcal{D}}[(\hat{\rho}_{\pi_{w_t}}(s, a, \theta_{\rho,t}^*) - \rho_{\pi_{w_t}}(s, a))\mathbb{E}_{\pi_{w_t}}[\hat{d}_{\pi_{w_t}}^q(s', a', \theta_{d_q,t}^*) - d_{\pi_{w_t}}^q(s', a')]] \\
 & \quad + \gamma \mathbb{E}_{\mathcal{D}}[(\hat{\rho}_{\pi_{w_t}}(s, a, \theta_{\rho,t}^*) - \rho_{\pi_{w_t}}(s, a))\mathbb{E}_{\pi_{w_t}}[(\hat{Q}_{\pi_{w_t}}(s', a', \theta_{q,t}^*) - Q_{\pi_{w_t}}(s', a'))\nabla_w \log \pi_{w_t}(s', a')]] \\
 & \quad + \gamma \mathbb{E}_{\mathcal{D}}[(\hat{d}_{\pi_{w_t}}^q(s, a, \theta_{\rho,t}^*, \theta_{\psi,t}^*) - d_{\pi_{w_t}}^q(s, a))\mathbb{E}_{\pi_{w_t}}[\hat{Q}_{\pi_{w_t}}(s', a', \theta_{q,t}^*) - Q_{\pi_{w_t}}(s', a')]] \\
 & \leq \sqrt{\mathbb{E}_{\mathcal{D}}[(\hat{\rho}_{\pi_{w_t}}(s, a, \theta_{\rho,t}^*) - \rho_{\pi_{w_t}}(s, a))^2]} \sqrt{\mathbb{E}_{\mathcal{D}}[(\hat{d}_{\pi_{w_t}}^q(s, a, \theta_{d_q,t}^*) - d_{\pi_{w_t}}^q(s, a))^2]} \\
 & \quad + \sqrt{\mathbb{E}_{\mathcal{D}}[(\hat{d}_{\pi_{w_t}}^q(s, a, \theta_{\rho,t}^*, \theta_{\psi,t}^*) - d_{\pi_{w_t}}^q(s, a))^2]} \sqrt{\mathbb{E}_{\mathcal{D}}[(\hat{Q}_{\pi_{w_t}}(s, a, \theta_{q,t}^*) - Q_{\pi_{w_t}}(s, a))^2]} \\
 & \quad + \sqrt{\mathbb{E}_{\mathcal{D}}[(\hat{\rho}_{\pi_{w_t}}(s, a, \theta_{\rho,t}^*) - \rho_{\pi_{w_t}}(s, a))^2]} \sqrt{\mathbb{E}_{\mathcal{D}_{d \cdot \pi_{w_t}}}[(\hat{d}_{\pi_{w_t}}^q(s', a', \theta_{d_q,t}^*) - d_{\pi_{w_t}}^q(s', a'))^2]} \\
 & \quad + C_{sc} \sqrt{\mathbb{E}_{\mathcal{D}}[(\hat{\rho}_{\pi_{w_t}}(s, a, \theta_{\rho,t}^*) - \rho_{\pi_{w_t}}(s, a))^2]} \sqrt{\mathbb{E}_{\mathcal{D}_{d \cdot \pi_{w_t}}}[(\hat{Q}_{\pi_{w_t}}(s', a', \theta_{q,t}^*) - Q_{\pi_{w_t}}(s', a'))^2]} \\
 & \quad + \sqrt{\mathbb{E}_{\mathcal{D}}[(\hat{d}_{\pi_{w_t}}^q(s, a, \theta_{\rho,t}^*, \theta_{\psi,t}^*) - d_{\pi_{w_t}}^q(s, a))^2]} \sqrt{\mathbb{E}_{\mathcal{D}_{d \cdot \pi_{w_t}}}[(\hat{Q}_{\pi_{w_t}}(s', a', \theta_{q,t}^*) - Q_{\pi_{w_t}}(s', a'))^2]} \\
 & \leq 2\epsilon_{\rho}\epsilon_{d_q} + 2\epsilon_{d_{\rho}}\epsilon_q + C_{sc}\epsilon_{\rho}\epsilon_q. \tag{74}
 \end{aligned}$$

Recall that we define

$$\begin{aligned}
 \epsilon_{\rho} &= \max_w \sqrt{\mathbb{E}_{\mathcal{D}}[(\hat{\rho}_{\pi_w}(s, a, \theta_{\rho,w}^*) - \rho_{\pi_w}(s, a))^2]} \\
 \epsilon_{d_{\rho}} &= \max_w \sqrt{\mathbb{E}_{\mathcal{D}}[(\hat{d}_{\pi_w}^{\rho}(s, a, \theta_{\rho,w}^*, \theta_{\psi,w}^*) - d_{\pi_w}^{\rho}(s, a))^2]} \\
 \epsilon_q &= \max \left\{ \max_w \sqrt{\mathbb{E}_{\mathcal{D}}[(\hat{Q}_{\pi_w}(s, a, \theta_{q,w}^*) - Q_{\pi_w}(s, a))^2]}, \max_w \sqrt{\mathbb{E}_{\mathcal{D}_{d \cdot \pi_w}}[(\hat{Q}_{\pi_w}(s', a', \theta_{q,w}^*) - Q_{\pi_w}(s', a'))^2]} \right\} \\
 \epsilon_{d_q} &= \max \left\{ \max_w \sqrt{\mathbb{E}_{\mathcal{D}}[(\hat{d}_{\pi_w}^q(s, a, \theta_{d_q,w}^*) - d_{\pi_w}^q(s, a))^2]}, \max_w \sqrt{\mathbb{E}_{\mathcal{D}_{d \cdot \pi_w}}[(\hat{d}_{\pi_w}^q(s', a', \theta_{d_q,w}^*) - d_{\pi_w}^q(s', a'))^2]} \right\},
 \end{aligned}$$

where

$$\begin{aligned}
 \hat{\rho}_{\pi_w}(s, a, \theta_{q,w}^*) &= \phi(s, a)^{\top} \theta_{\rho,w}^*, \\
 \hat{d}_{\pi_w}^{\rho}(s, a, \theta_{\rho,w}^*, \theta_{\psi,w}^*) &= \phi(s, a)^{\top} \theta_{\rho,w}^* \varphi(s, a)^{\top} \theta_{\psi,w}^*, \\
 \hat{Q}_{\pi_w}(s, a, \theta_{q,w}^*) &= \phi(s, a)^{\top} \theta_{q,w}^*, \\
 \hat{d}_{\pi_w}^q(s', a', \theta_{d_q,w}^*) &= x(s, a)^{\top} \theta_{d_q,w}^*.
 \end{aligned}$$

Then, eq. (74) implies that

$$\left\| \mathbb{E}[G_{\text{DR}}^i(w_t, \theta_{q,t}^*, \theta_{\rho,t}^*, \theta_{\psi,t}^*, \theta_{d_q,t}^*)] - \nabla_w J(w_t) \right\|_2^2 \leq 6\epsilon_{\rho}^2\epsilon_{d_q}^2 + 6\epsilon_{d_{\rho}}^2\epsilon_q^2 + 3C_{sc}\epsilon_{\rho}^2\epsilon_q^2. \tag{75}$$

Substituting eq. (69), eq. (70), eq. (71), eq. (72), eq. (73) and eq. (75) into eq. (68) yields

$$\begin{aligned}
 & \mathbb{E} \left[ \|G_{\text{DR}}(w_t, \mathcal{M}_t) - \nabla_w J(w_t)\|_2^2 \mid \mathcal{F}_t \right] \\
 & \leq 6C_6^2 \left\| \theta_{d_q,t}^* - \theta_{d_q,t} \right\|_2^2 + 6C_7^2 \left\| \theta_{\psi,t}^* - \theta_{\psi,t} \right\|_2^2 + 6C_8^2 \left\| \theta_{q,t}^* - \theta_{q,t} \right\|_2 + 6C_9^2 \left\| \theta_{\rho,t}^* - \theta_{\rho,t} \right\|_2^2 + \frac{24C_{10}^2}{N} \\
 & \quad + 36\epsilon_{\rho}^2\epsilon_{d_q}^2 + 36\epsilon_{d_{\rho}}^2\epsilon_q^2 + 18C_{sc}\epsilon_{\rho}^2\epsilon_q^2 \\
 & \leq C_{11} \left( \left\| \theta_{d_q,t}^* - \theta_{d_q,t} \right\|_2^2 + \left\| \theta_{\psi,t}^* - \theta_{\psi,t} \right\|_2^2 + \left\| \theta_{q,t}^* - \theta_{q,t} \right\|_2 + \left\| \theta_{\rho,t}^* - \theta_{\rho,t} \right\|_2^2 \right) + \frac{24C_{10}^2}{N}
 \end{aligned}$$



$$\begin{aligned}
 & + C_{12}(\epsilon_\rho^2 \epsilon_{d_q}^2 + \epsilon_{d_\rho}^2 \epsilon_q^2 + \epsilon_\rho^2 \epsilon_q^2) \\
 & \leq C_{11} \Delta_t + \frac{24C_{10}^2}{N} + C_{12}(\epsilon_\rho^2 \epsilon_{d_q}^2 + \epsilon_{d_\rho}^2 \epsilon_q^2 + \epsilon_\rho^2 \epsilon_q^2),
 \end{aligned} \tag{76}$$

where  $C_{11} = 6 \max\{C_6^2, C_7^2, C_8^2, C_9^2\}$ , and  $C_{12} = \max\{36, 18C_{sc}\}$ . Substituting eq. (76) into eq. (67) yields

$$\begin{aligned}
 & \left(\frac{1}{2}\alpha - L_J \alpha^2\right) \mathbb{E}[\|\nabla_w J(w_t)\|_2^2 | \mathcal{F}_t] \\
 & \leq \mathbb{E}[J(w_{t+1}) | \mathcal{F}_t] - J(w_t) + \left(\frac{1}{2}\alpha + L_J \alpha^2\right) C_{11} \Delta_t + \left(\frac{1}{2}\alpha + L_J \alpha^2\right) \frac{24C_{10}^2}{N} \\
 & \quad + \left(\frac{1}{2}\alpha + L_J \alpha^2\right) C_{12}(\epsilon_\rho^2 \epsilon_{d_q}^2 + \epsilon_{d_\rho}^2 \epsilon_q^2 + \epsilon_\rho^2 \epsilon_q^2).
 \end{aligned} \tag{77}$$

Taking the expectation on both sides of eq. (77) and taking the summation over  $t = 0 \dots T - 1$  yield

$$\begin{aligned}
 & \left(\frac{1}{2}\alpha - L_J \alpha^2\right) \sum_{t=0}^{T-1} \mathbb{E}[\|\nabla_w J(w_t)\|_2^2] \\
 & \leq \mathbb{E}[J(w_T)] - J(w_0) + \left(\frac{1}{2}\alpha + L_J \alpha^2\right) C_{11} \sum_{t=0}^{T-1} \mathbb{E}[\Delta_t] + \left(\frac{1}{2}\alpha + L_J \alpha^2\right) \frac{24C_{10}^2 T}{N} \\
 & \quad + \left(\frac{1}{2}\alpha + L_J \alpha^2\right) C_{12}(\epsilon_\rho^2 \epsilon_{d_q}^2 + \epsilon_{d_\rho}^2 \epsilon_q^2 + \epsilon_\rho^2 \epsilon_q^2) T.
 \end{aligned} \tag{78}$$

We then proceed to bound the term  $\sum_{t=0}^{T-1} \mathbb{E}[\Delta_t]$ . Lemma 7 implies that

$$\begin{aligned}
 & \mathbb{E}[\Delta_{t+1} | \mathcal{F}_t] \\
 & \leq \left(1 - \frac{1}{2}\rho\right) \Delta_t + \frac{2L_{fix}^2}{\rho} \mathbb{E}[\|w_{t+1} - w_t\|_2^2 | \mathcal{F}_t] + \frac{C_5}{(1-\rho)N} \\
 & = \left(1 - \frac{1}{2}\rho\right) \Delta_t + \frac{2L_{fix}^2}{\rho} \alpha^2 \mathbb{E}[\|G_{DR}(w_t, \mathcal{M}_t)\|_2^2 | \mathcal{F}_t] + \frac{C_5}{(1-\rho)N} \\
 & \leq \left(1 - \frac{1}{2}\rho\right) \Delta_t + \frac{4L_{fix}^2}{\rho} \alpha^2 \mathbb{E}[\|G_{DR}(w_t, \mathcal{M}_t) - \nabla_w J(w_t)\|_2^2 | \mathcal{F}_t] + \frac{4L_{fix}^2}{\rho} \alpha^2 \mathbb{E}[\|\nabla_w J(w_t)\|_2^2 | \mathcal{F}_t] + \frac{C_5}{(1-\rho)N} \\
 & \stackrel{(i)}{\leq} \left(1 - \frac{1}{2}\rho + \frac{4C_{11}L_{fix}^2 \alpha^2}{\rho}\right) \Delta_t + \frac{4L_{fix}^2}{\rho} \alpha^2 \mathbb{E}[\|\nabla_w J(w_t)\|_2^2 | \mathcal{F}_t] + \left[\frac{96L_{fix}^2 C_{10}^2 \alpha^2}{\rho} + \frac{C_5}{1-\rho}\right] \frac{1}{N} \\
 & \quad + \frac{4C_{12}L_{fix}^2 \alpha^2}{\rho} (\epsilon_\rho^2 \epsilon_{d_q}^2 + \epsilon_{d_\rho}^2 \epsilon_q^2 + \epsilon_\rho^2 \epsilon_q^2) \\
 & \stackrel{(ii)}{\leq} \left(1 - \frac{1}{4}\rho\right) \Delta_t + C_{12} \alpha^2 \mathbb{E}[\|\nabla_w J(w_t)\|_2^2 | \mathcal{F}_t] + \frac{C_{13}}{N} + C_{14}(\epsilon_\rho^2 \epsilon_{d_q}^2 + \epsilon_{d_\rho}^2 \epsilon_q^2 + \epsilon_\rho^2 \epsilon_q^2),
 \end{aligned} \tag{79}$$

where  $L_{fix}^2 = (L_\kappa^2 + L_\xi^2 + L_\zeta^2)$ , (i) follows from eq. (76), (ii) follows from the fact that  $C_{12} = \frac{4L_{fix}^2}{\rho}$ ,  $C_{13} = \frac{96L_{fix}^2 C_{10}^2 \alpha^2}{\rho} + \frac{C_5}{1-\rho}$  and  $C_{14} = \frac{4C_{12}L_{fix}^2 \alpha^2}{\rho}$ , and for small enough  $\alpha$ , we have  $\alpha \leq \frac{\rho}{4\sqrt{C_{11}L_{fix}}}$ . Taking the expectation on both sides of eq. (79) and applying it iteratively yield

$$\begin{aligned}
 \mathbb{E}[\Delta_t] & \leq \left(1 - \frac{1}{4}\rho\right)^t \Delta_0 + C_{12} \alpha^2 \sum_{i=0}^{t-1} \left(1 - \frac{1}{4}\rho\right)^{t-1-i} \mathbb{E}[\|\nabla_w J(w_i)\|_2^2] + \frac{C_{13}}{N} \sum_{i=0}^{t-1} \left(1 - \frac{1}{4}\rho\right)^{t-1-i} \\
 & \quad + C_{14}(\epsilon_\rho^2 \epsilon_{d_q}^2 + \epsilon_{d_\rho}^2 \epsilon_q^2 + \epsilon_\rho^2 \epsilon_q^2) \sum_{i=0}^{t-1} \left(1 - \frac{1}{4}\rho\right)^{t-1-i}.
 \end{aligned} \tag{80}$$

Taking the summation on eq. (80) over  $t = 0, \dots, T - 1$  yields

$$\sum_{t=0}^{T-1} \mathbb{E}[\Delta_t] \leq \Delta_0 \sum_{t=0}^{T-1} \left(1 - \frac{1}{4}\rho\right)^t + C_{12} \alpha^2 \sum_{t=0}^{T-1} \sum_{i=0}^{t-1} \left(1 - \frac{1}{4}\rho\right)^{t-1-i} \mathbb{E}[\|\nabla_w J(w_i)\|_2^2] + \frac{C_{13}}{N} \sum_{t=0}^{T-1} \sum_{i=0}^{t-1} \left(1 - \frac{1}{4}\rho\right)^{t-1-i}$$

$$\begin{aligned}
 & + C_{14}(\epsilon_\rho^2 \epsilon_{d_q}^2 + \epsilon_{d_\rho}^2 \epsilon_q^2 + \epsilon_\rho^2 \epsilon_q^2) \sum_{t=0}^{T-1} \sum_{i=0}^{t-1} \left(1 - \frac{1}{4}\rho\right)^{t-1-i} \\
 & \leq \frac{4}{\rho} \Delta_0 + \frac{4C_{12}\alpha^2}{\rho} \sum_{t=0}^{T-1} \mathbb{E}[\|\nabla_w J(w_t)\|_2^2] + \frac{4C_{13}T}{\rho N} + \frac{4C_{14}T}{\rho} (\epsilon_\rho^2 \epsilon_{d_q}^2 + \epsilon_{d_\rho}^2 \epsilon_q^2 + \epsilon_\rho^2 \epsilon_q^2). \tag{81}
 \end{aligned}$$

Substituting eq. (81) into eq. (78) yields

$$\begin{aligned}
 & \left(\frac{1}{2}\alpha - L_J\alpha^2\right) \sum_{t=0}^{T-1} \mathbb{E}[\|\nabla_w J(w_t)\|_2^2] \\
 & \leq \mathbb{E}[J(w_T)] - J(w_0) + \left(\frac{1}{2}\alpha + L_J\alpha^2\right) \frac{4C_{11}}{\rho} \Delta_0 + \frac{4C_{12}\alpha^2}{\rho} \left(\frac{1}{2}\alpha + L_J\alpha^2\right) \sum_{t=0}^{T-1} \mathbb{E}[\|\nabla_w J(w_t)\|_2^2] \\
 & \quad + \left(\frac{1}{2}\alpha + L_J\alpha^2\right) \frac{24\rho C_{10}^2 T + 4C_{13}T}{\rho N} + \left(\frac{1}{2}\alpha + L_J\alpha^2\right) \left(C_{12} + \frac{4C_{14}T}{\rho}\right) (\epsilon_\rho^2 \epsilon_{d_q}^2 + \epsilon_{d_\rho}^2 \epsilon_q^2 + \epsilon_\rho^2 \epsilon_q^2) T, \tag{82}
 \end{aligned}$$

which implies

$$\begin{aligned}
 & \left(\frac{1}{2}\alpha - L_J\alpha^2 - \frac{4C_{12}\alpha^3}{\rho} \left(\frac{1}{2} + L_J\alpha\right)\right) \sum_{t=0}^{T-1} \mathbb{E}[\|\nabla_w J(w_t)\|_2^2] \\
 & \leq \mathbb{E}[J(w_T)] - J(w_0) + \left(\frac{1}{2}\alpha + L_J\alpha^2\right) \frac{4C_{11}}{\rho} \Delta_0 + \left(\frac{1}{2}\alpha + L_J\alpha^2\right) \frac{24\rho C_{10}^2 T + 4C_{13}T}{\rho N} \\
 & \quad + \left(\frac{1}{2}\alpha + L_J\alpha^2\right) \left(C_{12} + \frac{4C_{14}T}{\rho}\right) (\epsilon_\rho^2 \epsilon_{d_q}^2 + \epsilon_{d_\rho}^2 \epsilon_q^2 + \epsilon_\rho^2 \epsilon_q^2) T. \tag{83}
 \end{aligned}$$

For small enough  $\alpha$ , we can guarantee that  $\frac{1}{2}\alpha - L_J\alpha^2 - \frac{4C_{12}\alpha^3}{\rho} \left(\frac{1}{2} + L_J\alpha\right) > 0$ . Dividing both sides of eq. (83) by  $T\left(\frac{1}{2}\alpha - L_J\alpha^2 - \frac{4C_{12}\alpha^3}{\rho} \left(\frac{1}{2} + L_J\alpha\right)\right)$ , we obtain

$$\mathbb{E}[\|\nabla_w J(w_{\hat{T}})\|_2^2] = \frac{1}{T} \sum_{t=0}^{T-1} \mathbb{E}[\|\nabla_w J(w_t)\|_2^2] \leq \Theta\left(\frac{1}{T}\right) + \Theta\left(\frac{1}{N}\right) + \Theta(\epsilon_\rho^2 \epsilon_{d_q}^2 + \epsilon_{d_\rho}^2 \epsilon_q^2 + \epsilon_\rho^2 \epsilon_q^2).$$

Note that  $\mathbb{E}[\|\nabla_w J(w_{\hat{T}})\|_2] \leq \sqrt{\mathbb{E}[\|\nabla_w J(w_{\hat{T}})\|_2^2]}$  and  $\sqrt{\sum_i a_i} \leq \sum_i \sqrt{a_i}$  for  $a_i \geq 0$ . We obtain

$$\mathbb{E}[\|\nabla_w J(w_{\hat{T}})\|_2] \leq \Theta\left(\frac{1}{\sqrt{T}}\right) + \Theta\left(\frac{1}{\sqrt{N}}\right) + \Theta(\epsilon_\rho \epsilon_{d_q} + \epsilon_{d_\rho} \epsilon_q + \epsilon_\rho \epsilon_q),$$

which completes the proof.

### E. Proof of Theorem 3

The following proposition can be directly obtained from Corollary 6.10. in (Agarwal et al., 2019).

**Proposition 2.** Consider the DR-Off-PAC update given in Algorithm 1. Suppose Assumption 5 holds. Let  $w_t^* = F^{-1}(w_t) \nabla_w J(w_t)$  be the exact NPG update direction at  $w_t$ . Then, we have

$$\begin{aligned}
 & J(\pi^*) - J(w_{\hat{T}}) \\
 & \leq \frac{\epsilon_{approx}}{1-\gamma} + \frac{1}{\alpha T} \mathbb{E}_{\nu_{\pi^*}} [KL(\pi^*(\cdot|s) || \pi_{w_0}(\cdot|s))] + \frac{L_{sc}\alpha}{2T} \sum_{t=0}^{T-1} \|G_{DR}(w_t, \mathcal{M}_t)\|_2^2 + \frac{C_{sc}}{T} \sum_{t=0}^{T-1} \|G_{DR}(w_t, \mathcal{M}_t) - w_t^*\|_2. \tag{84}
 \end{aligned}$$

Proposition 2 indicates that, as long as the DR-Off-PAC update is close enough to the exact NPG update, then DP-Off-PAC is guaranteed to converge to a neighbourhood of the global optimal  $J(\pi^*)$  with a  $\left(\frac{\epsilon_{approx}}{1-\gamma}\right)$ -level gap. We then proceed to prove Theorem 3.

*Proof.* We start with eq. (84) as follows:

$$\begin{aligned}
 & J(\pi^*) - \mathbb{E}[J(w_{\hat{T}})] \\
 & \leq \frac{\epsilon_{approx}}{1-\gamma} + \frac{1}{\alpha T} \mathbb{E}_{\nu_{\pi^*}} [\text{KL}(\pi^*(\cdot|s) || \pi_{w_0}(\cdot|s))] + \frac{L_{sc}\alpha}{2T} \sum_{t=0}^{T-1} \mathbb{E}[\|G_{DR}(w_t, \mathcal{M}_t)\|_2^2] + \frac{C_{sc}}{T} \sum_{t=0}^{T-1} \mathbb{E}[\|G_{DR}(w_t, \mathcal{M}_t) - w_t^*\|_2] \\
 & \leq \frac{\epsilon_{approx}}{1-\gamma} + \frac{1}{\alpha T} \mathbb{E}_{\nu_{\pi^*}} [\text{KL}(\pi^*(\cdot|s) || \pi_{w_0}(\cdot|s))] + \frac{L_{sc}\alpha}{T} \sum_{t=0}^{T-1} \mathbb{E}[\|G_{DR}(w_t, \mathcal{M}_t) - \nabla_w J(w_t)\|_2^2] + \frac{L_{sc}\alpha}{T} \sum_{t=0}^{T-1} \mathbb{E}[\|\nabla_w J(w_t)\|_2^2] \\
 & \quad + \frac{C_{sc}}{T} \sum_{t=0}^{T-1} \mathbb{E}[\|G_{DR}(w_t, \mathcal{M}_t) - \nabla_w J(w_t)\|_2] + \frac{C_{sc}}{T} \sum_{t=0}^{T-1} \mathbb{E}[\|\nabla_w J(w_t) - w_t^*\|_2]. \tag{85}
 \end{aligned}$$

We then bound the error terms on the right-hand side of eq. (85) separately.

First consider the term  $\frac{1}{T} \sum_{t=0}^{T-1} \mathbb{E}[\|\nabla_w J(w_t)\|_2^2]$ . We have

$$\begin{aligned}
 \frac{1}{T} \sum_{t=0}^{T-1} \mathbb{E}[\|\nabla_w J(w_t)\|_2^2] &= \mathbb{E}[\|\nabla_w J(w_{\hat{T}})\|_2^2] \\
 &\stackrel{(i)}{\leq} \Theta\left(\frac{1}{T}\right) + \Theta\left(\frac{1}{N}\right) + \Theta(\epsilon_\rho^2 \epsilon_{d_q}^2 + \epsilon_{d_\rho}^2 \epsilon_q^2 + \epsilon_\rho^2 \epsilon_q^2), \tag{86}
 \end{aligned}$$

where (i) follows from Theorem 2.

Then we consider the term  $\frac{1}{T} \sum_{t=0}^{T-1} \|\nabla_w J(w_t) - w_t^*\|_2$ . We proceed as follows.

$$\begin{aligned}
 & \frac{1}{T} \sum_{t=0}^{T-1} \mathbb{E}[\|\nabla_w J(w_t) - w_t^*\|_2] \\
 &= \frac{1}{T} \sum_{t=0}^{T-1} \mathbb{E}[\|(I - F^{-1}(w_t))\nabla_w J(w_t)\|_2] \leq \left(1 + \frac{1}{\lambda_F}\right) \frac{1}{T} \sum_{t=0}^{T-1} \mathbb{E}[\|\nabla_w J(w_t)\|_2] \\
 &= \left(1 + \frac{1}{\lambda_F}\right) \mathbb{E}[\|\nabla_w J(w_{\hat{T}})\|_2] = \left(1 + \frac{1}{\lambda_F}\right) \sqrt{\mathbb{E}[\|\nabla_w J(w_{\hat{T}})\|_2^2]} \\
 &\stackrel{(i)}{\leq} \Theta\left(\frac{1}{\sqrt{T}}\right) + \Theta\left(\frac{1}{\sqrt{N}}\right) + \Theta(\epsilon_\rho \epsilon_{d_q} + \epsilon_{d_\rho} \epsilon_q + \epsilon_\rho \epsilon_q), \tag{87}
 \end{aligned}$$

where (i) follows from eq. (86) and the fact that  $\sqrt{\sum_i a_i} \leq \sum_i \sqrt{a_i}$  for  $a_i \geq 0$ .

We then consider the term  $\frac{1}{T} \sum_{t=0}^{T-1} \mathbb{E}[\|G_{DR}(w_t, \mathcal{M}_t) - \nabla_w J(w_t)\|_2]$ . Recalling eq. (76), we have

$$\mathbb{E}[\|G_{DR}(w_t, \mathcal{M}_t) - \nabla_w J(w_t)\|_2^2 | \mathcal{F}_t] \leq C_{11} \Delta_t + \frac{24C_{10}^2}{N} + C_{12}(\epsilon_\rho^2 \epsilon_{d_q}^2 + \epsilon_{d_\rho}^2 \epsilon_q^2 + \epsilon_\rho^2 \epsilon_q^2),$$

which implies

$$\begin{aligned}
 \mathbb{E}[\|G_{DR}(w_t, \mathcal{M}_t) - \nabla_w J(w_t)\|_2 | \mathcal{F}_t] &\leq \sqrt{\mathbb{E}[\|G_{DR}(w_t, \mathcal{M}_t) - \nabla_w J(w_t)\|_2^2 | \mathcal{F}_t]} \\
 &\leq \sqrt{C_{11}} \sqrt{\Delta_t} + \frac{5C_{10}}{\sqrt{N}} + \sqrt{C_{12}}(\epsilon_\rho \epsilon_{d_q} + \epsilon_{d_\rho} \epsilon_q + \epsilon_\rho \epsilon_q). \tag{88}
 \end{aligned}$$

Taking the expectation on both sides of eq. (88) and taking the summation over  $t = 1 \dots T - 1$  yield

$$\frac{1}{T} \sum_{t=0}^{T-1} \mathbb{E}[\|G_{DR}(w_t, \mathcal{M}_t) - \nabla_w J(w_t)\|_2] \leq \frac{\sqrt{C_{11}}}{T} \sum_{t=0}^{T-1} \mathbb{E}[\sqrt{\Delta_t}] + \frac{5C_{10}}{\sqrt{N}} + \sqrt{C_{12}}(\epsilon_\rho \epsilon_{d_q} + \epsilon_{d_\rho} \epsilon_q + \epsilon_\rho \epsilon_q). \tag{89}$$

We then bound the term  $\sum_{t=0}^{T-1} \mathbb{E}[\sqrt{\Delta_t}]$ . Note that

$$\frac{1}{T} \sum_{t=0}^{T-1} \mathbb{E}[\sqrt{\Delta_t}] = \mathbb{E}[\sqrt{\Delta_{\hat{T}}}] \leq \sqrt{\mathbb{E}[\Delta_{\hat{T}}]} = \sqrt{\frac{1}{T} \sum_{t=0}^{T-1} \mathbb{E}[\Delta_t]}. \quad (90)$$

Recalling eq. (81), we have

$$\sum_{t=0}^{T-1} \mathbb{E}[\Delta_t] \leq \frac{4}{\varrho} \Delta_0 + \frac{4C_{12}\alpha^2}{\varrho} \sum_{t=0}^{T-1} \mathbb{E}[\|\nabla_w J(w_t)\|_2^2] + \frac{4C_{13}T}{\varrho N} + \frac{4C_{14}T}{\varrho} (\epsilon_\rho^2 \epsilon_{d_q}^2 + \epsilon_{d_\rho}^2 \epsilon_q^2 + \epsilon_\rho^2 \epsilon_q^2),$$

which implies

$$\begin{aligned} \frac{1}{T} \sum_{t=0}^{T-1} \mathbb{E}[\sqrt{\Delta_t}] &\leq \sqrt{\frac{1}{T} \sum_{t=0}^{T-1} \mathbb{E}[\Delta_t]} \\ &\leq \sqrt{\frac{4\Delta_0}{\varrho T} + \frac{2\sqrt{C_{12}}\alpha}{\sqrt{\varrho}} \sqrt{\mathbb{E}[\|\nabla_w J(w_{\hat{T}})\|_2^2]} + \sqrt{\frac{4C_{13}}{\varrho N}} + \sqrt{\frac{4C_{14}}{\varrho}} (\epsilon_\rho \epsilon_{d_q} + \epsilon_{d_\rho} \epsilon_q + \epsilon_\rho \epsilon_q)} \\ &\stackrel{(i)}{\leq} \Theta\left(\frac{1}{\sqrt{T}}\right) + \Theta\left(\frac{1}{\sqrt{N}}\right) + \Theta(\epsilon_\rho \epsilon_{d_q} + \epsilon_{d_\rho} \epsilon_q + \epsilon_\rho \epsilon_q), \end{aligned} \quad (91)$$

where (i) follows from eq. (86). Substituting eq. (91) into eq. (89) yields

$$\frac{1}{T} \sum_{t=0}^{T-1} \mathbb{E}[\|G_{\text{DR}}(w_t, \mathcal{M}_t) - \nabla_w J(w_t)\|_2] \leq \Theta\left(\frac{1}{\sqrt{T}}\right) + \Theta\left(\frac{1}{\sqrt{N}}\right) + \Theta(\epsilon_\rho \epsilon_{d_q} + \epsilon_{d_\rho} \epsilon_q + \epsilon_\rho \epsilon_q). \quad (92)$$

Finally, we consider the term  $\frac{1}{T} \sum_{t=0}^{T-1} \mathbb{E}[\|G_{\text{DR}}(w_t, \mathcal{M}_t) - \nabla_w J(w_t)\|_2^2]$ . Taking the expectation on both sides of eq. (76) and taking the summation over  $t = 0, \dots, T-1$  yield

$$\begin{aligned} \frac{1}{T} \sum_{t=0}^{T-1} \mathbb{E}[\|G_{\text{DR}}(w_t, \mathcal{M}_t) - \nabla_w J(w_t)\|_2^2] &\leq \frac{C_{11}}{T} \sum_{t=0}^{T-1} \mathbb{E}[\Delta_t] + \frac{24C_{10}^2}{N} + C_{12}(\epsilon_\rho^2 \epsilon_{d_q}^2 + \epsilon_{d_\rho}^2 \epsilon_q^2 + \epsilon_\rho^2 \epsilon_q^2) \\ &\stackrel{(i)}{\leq} \frac{4C_{11}}{\varrho T} \Delta_0 + \frac{4C_{11}C_{12}\alpha^2}{\varrho T} \sum_{t=0}^{T-1} \mathbb{E}[\|\nabla_w J(w_t)\|_2^2] + \frac{4C_{11}C_{13}}{\varrho N} + \frac{4C_{11}C_{14}}{\varrho} (\epsilon_\rho^2 \epsilon_{d_q}^2 + \epsilon_{d_\rho}^2 \epsilon_q^2 + \epsilon_\rho^2 \epsilon_q^2) \\ &\quad + \frac{24C_{10}^2}{N} + C_{12}(\epsilon_\rho^2 \epsilon_{d_q}^2 + \epsilon_{d_\rho}^2 \epsilon_q^2 + \epsilon_\rho^2 \epsilon_q^2) \\ &\stackrel{(ii)}{\leq} \Theta\left(\frac{1}{T}\right) + \Theta\left(\frac{1}{N}\right) + \Theta(\epsilon_\rho^2 \epsilon_{d_q}^2 + \epsilon_{d_\rho}^2 \epsilon_q^2 + \epsilon_\rho^2 \epsilon_q^2), \end{aligned} \quad (93)$$

where (i) follows from eq. (81), and (ii) follows from Theorem 2.

Substituting eq. (86), eq. (87), eq. (92) and eq. (93) into eq. (85) yields

$$J(\pi^*) - J(w_{\hat{T}}) \leq \frac{\epsilon_{\text{approx}}}{1-\gamma} + \Theta\left(\frac{1}{\sqrt{T}}\right) + \Theta\left(\frac{1}{\sqrt{N}}\right) + \Theta(\epsilon_\rho \epsilon_{d_q} + \epsilon_{d_\rho} \epsilon_q + \epsilon_\rho \epsilon_q),$$

which completes the proof.  $\square$
